# Supplementary material for: HnRNPK maintains single strand RNA through controlling double-strand RNA in mammalian cells
Source: PubMed Central journal article supplement (PMC9424213; doi:10.1038/s41467-022-32537-0), 2022-08-29
Supplement: 41467_2022_32537_MOESM1_ESM.pdf [file 41467_2022_32537_MOESM1_ESM.pdf]

# Supplementary Figure 1

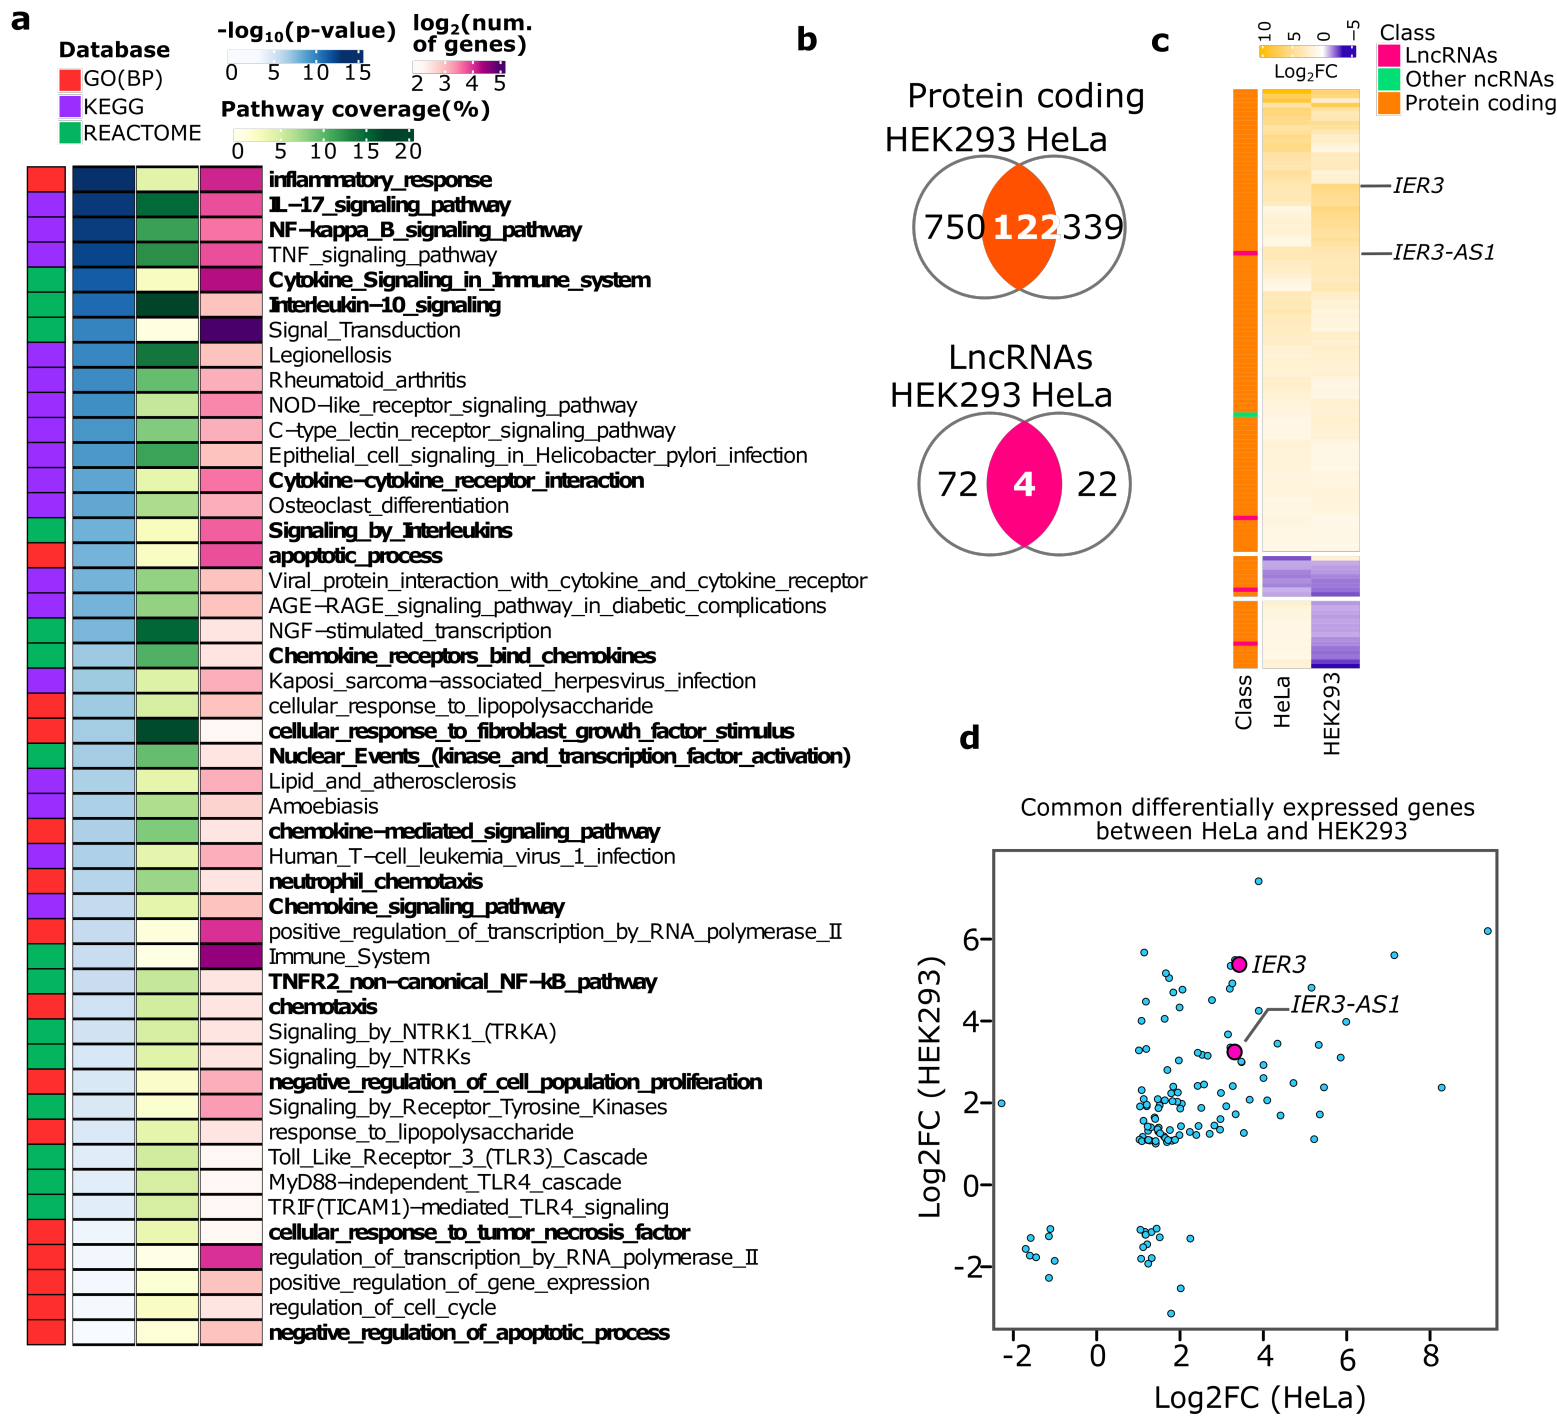

**Supplementary Figure 1:** a) Heatmaps depict significantly enriched biological functions of FGF-2 induced common protein coding genes from the three cell lines, ranked using geneSCF using databases gene ontology (GO) terms KEGG and REACTOME. b) Venn diagram showing FGF -2 induced commonly upregulated and downregulated DEGs in both HEK2993 and HeLa cell lines. c) Heatmap representing the common protein coding genes and non-coding genes showing the same and differential expression pattern in FGF-2 induced HEK2993 and HeLa cell lines. d) Log<sub>2</sub>FC values for the common DEGs in FGF-2 induced HEK2993 and HeLa cell lines. Pink dots depict the Log<sub>2</sub>FC values of *IER3* and *IER3-AS1*.

# Supplementary Figure 2

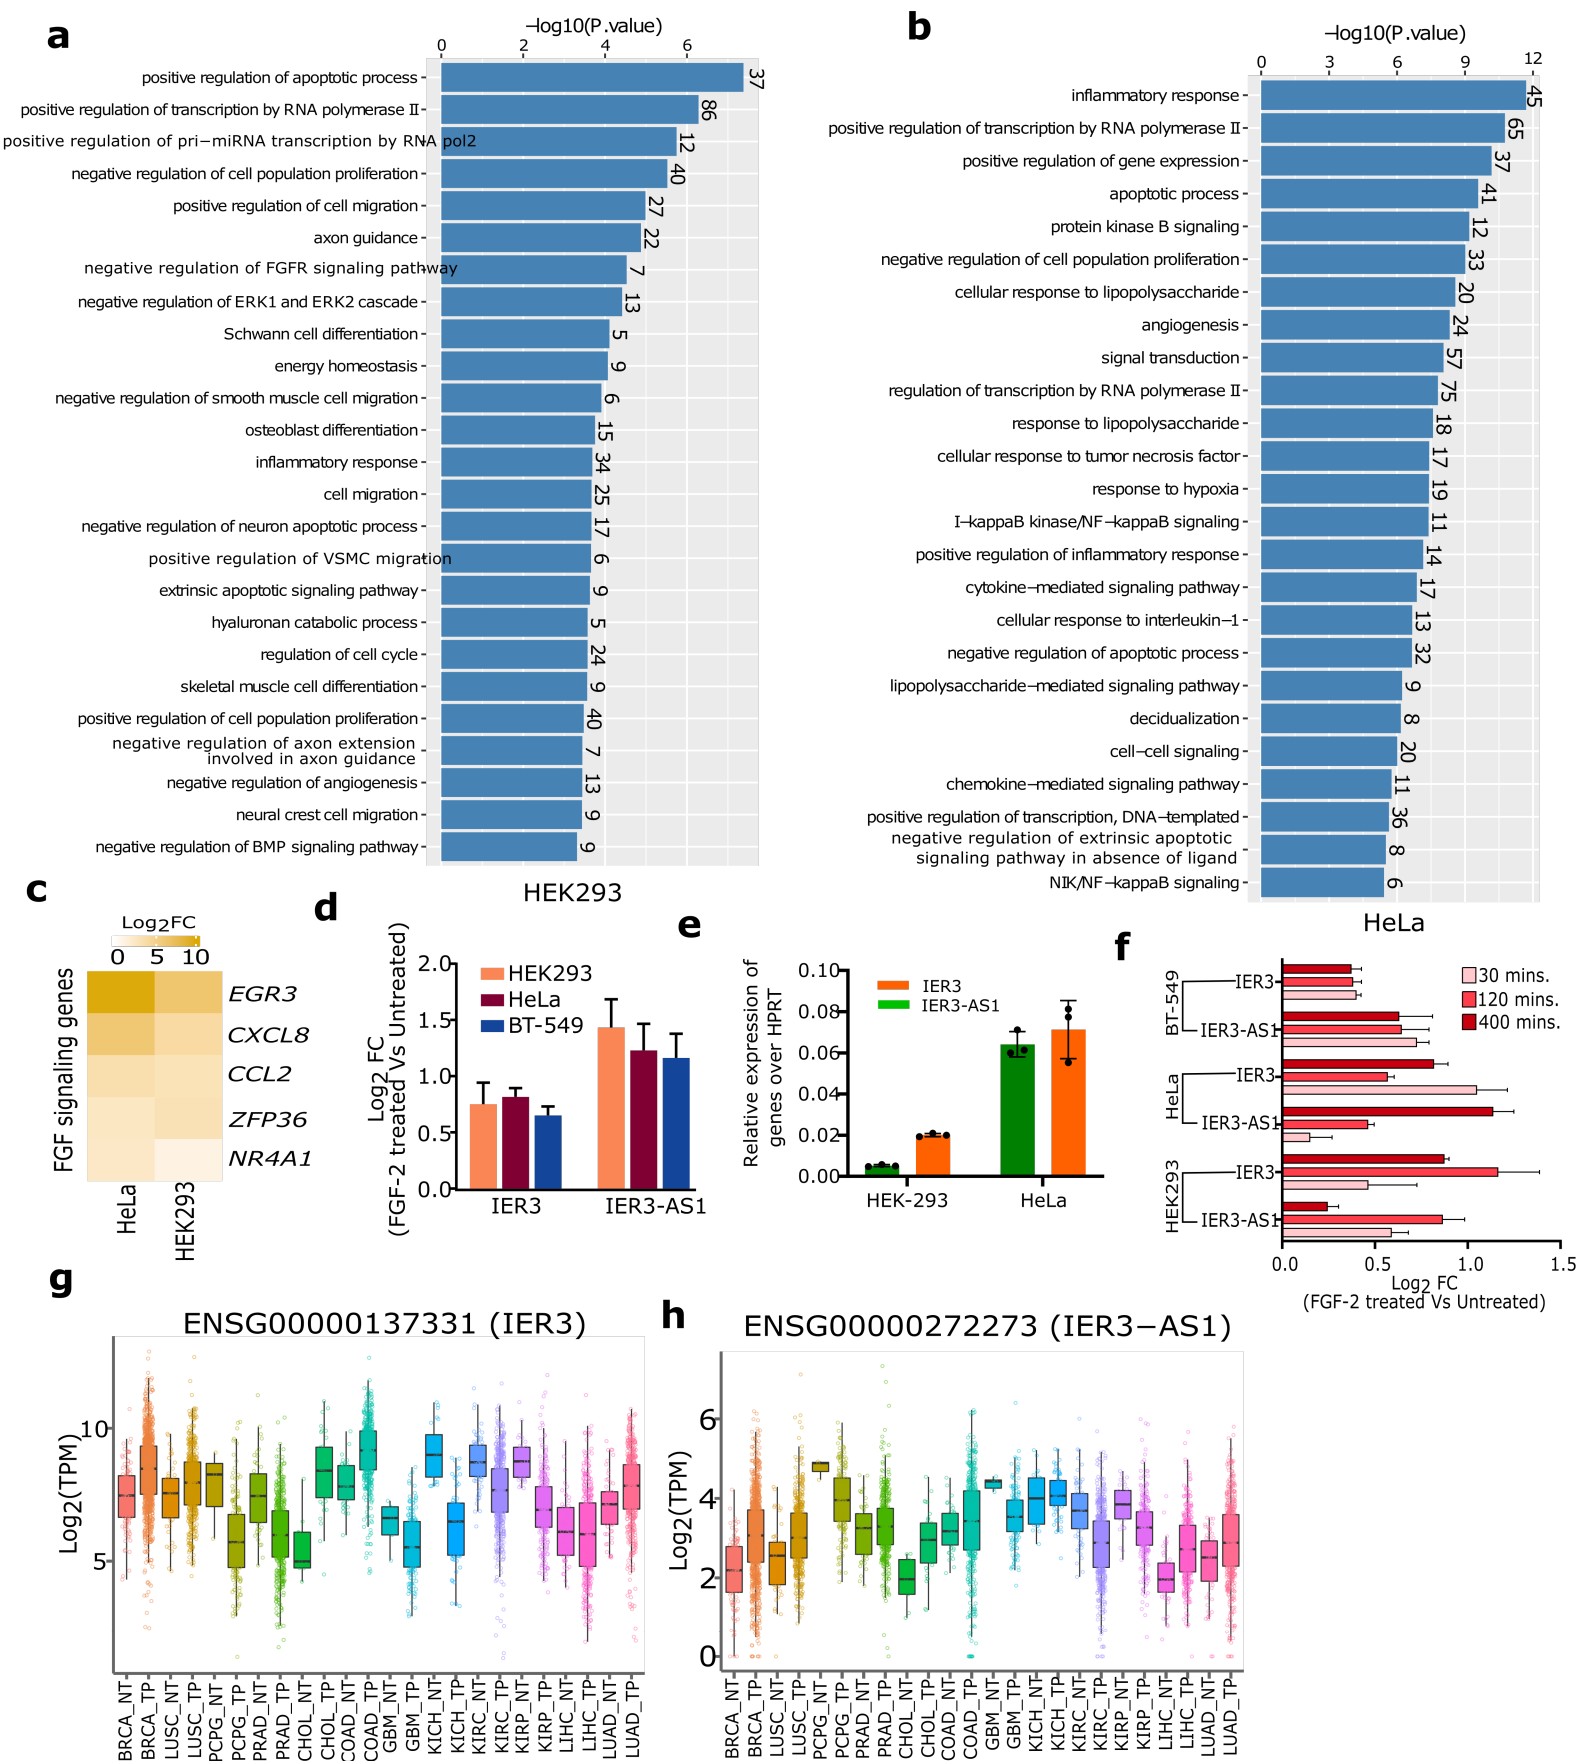

**Supplementary Figure 2:** a-b) Functional gene enrichment analysis of FGF-2 induced HEK293 (A) and HeLa (B) specific DEGs. c) Heatmap showing the expression pattern of DEGs related to fibroblast growth factor stimulus signaling pathway. d) RT-qPCR validation of FGF-2 dependent induction of IER3 and IER3-AS1 in HEK293, HeLa and BT-549 cell lines. e) Basal expression of IER3 and IER3-AS1 transcripts in HEK293 and HeLa cell lines. f) Log2FC levels of IER3 and IER3-AS1 at the indicated FGF-2 treatment time points and the data is presented over un-treated samples. Protein lysates from this experiment was used to generate Western blot data presented in Figure 1d. The p values were calculated using two-sided student's t-test and data are presented  $\pm$  SD from two independent replicates for d-f. g-h) Differential expression status of IER3 (g) and IER3-AS1(h) across different cancer types from TCGA. NT means normal and TP means Tumor. Box plots represent low expression range (lower whiskers), higher expression range, (upper whisker), median, inter quartile range (IQR), and the extreme expression values.

# Supplemental Figure 3

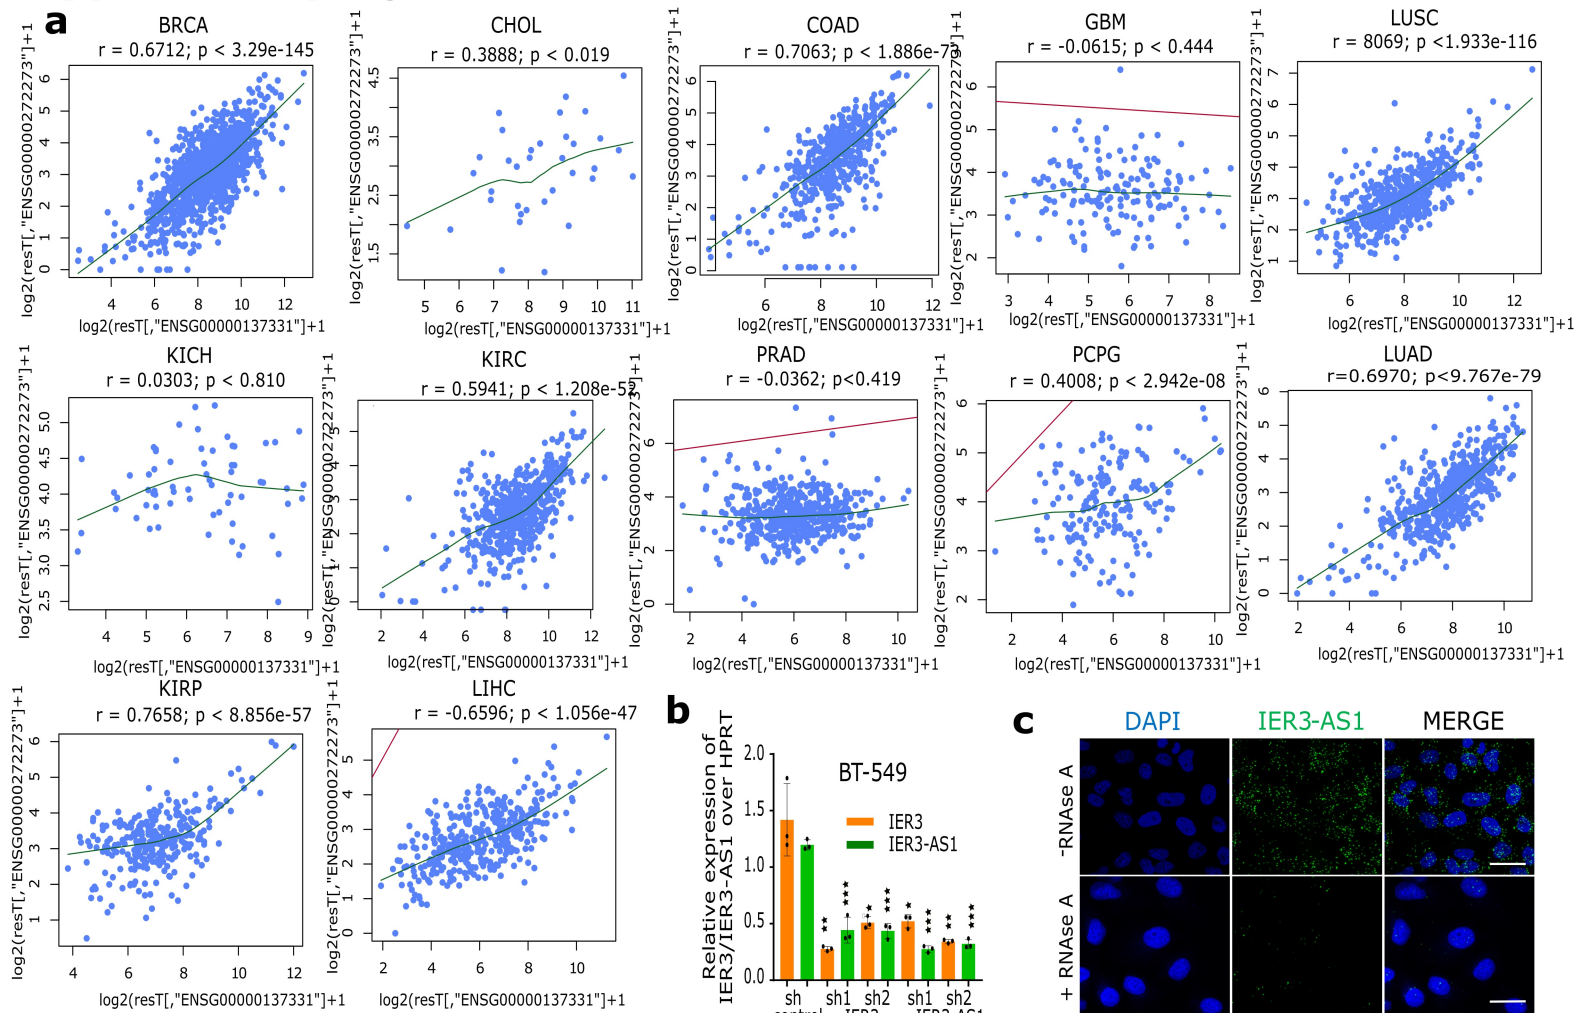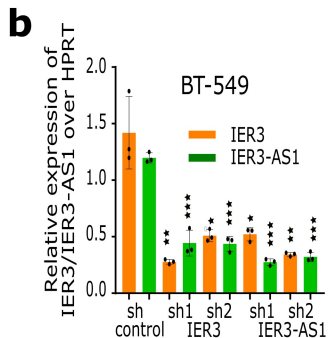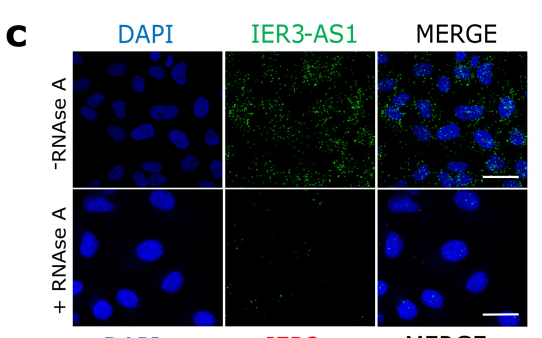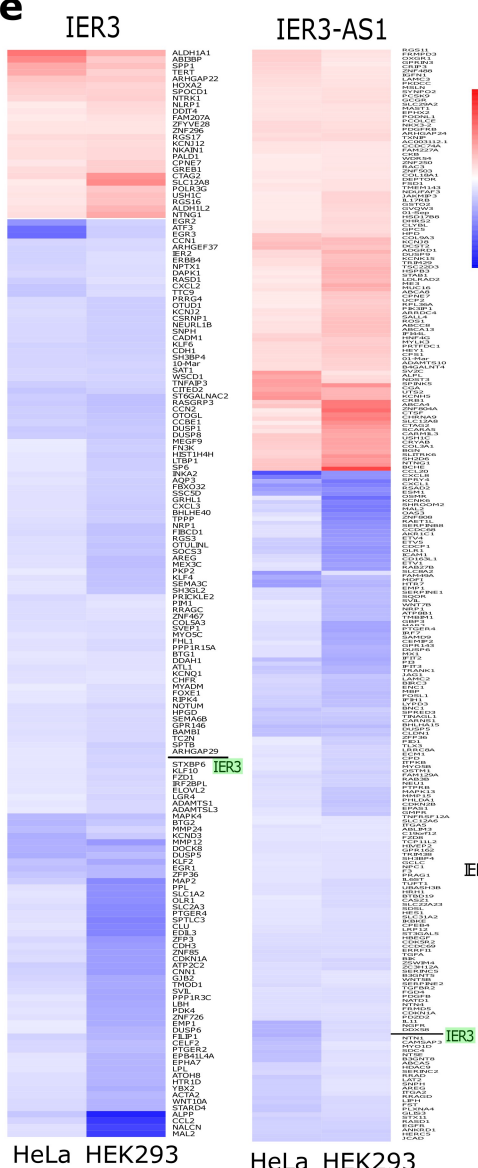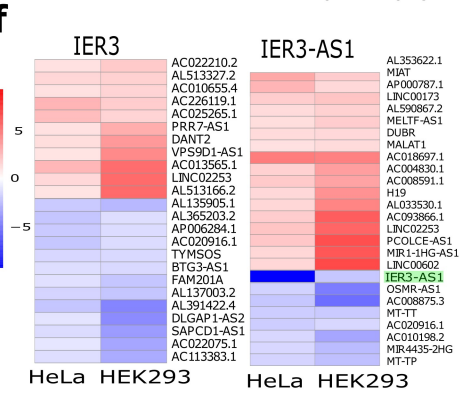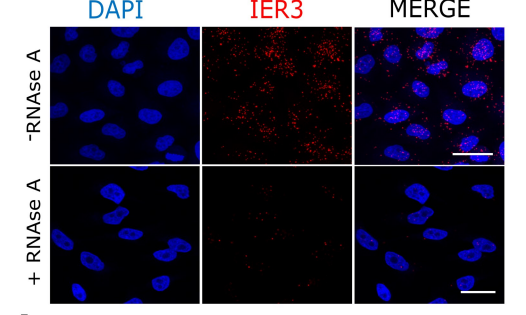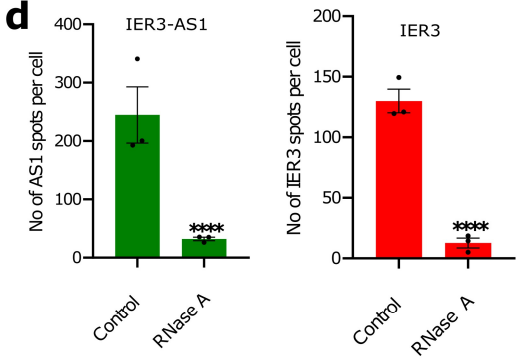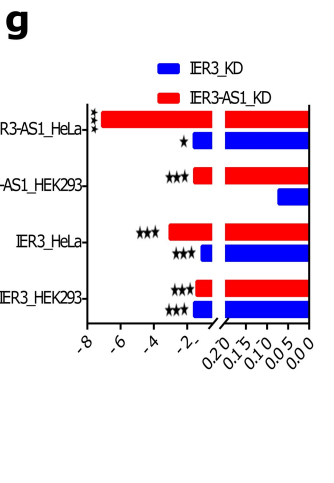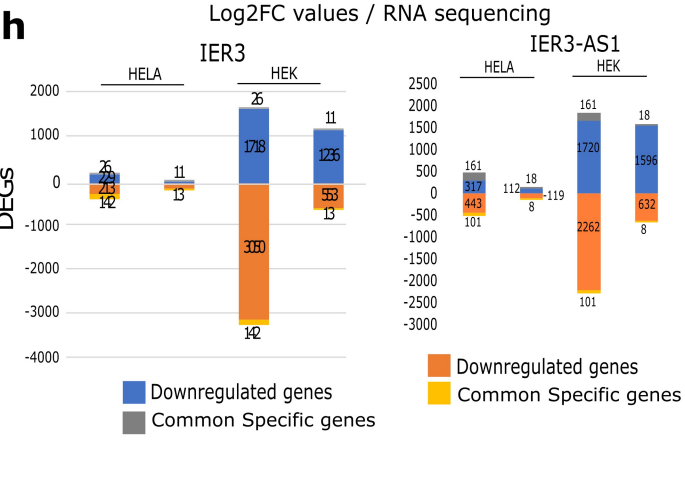

i

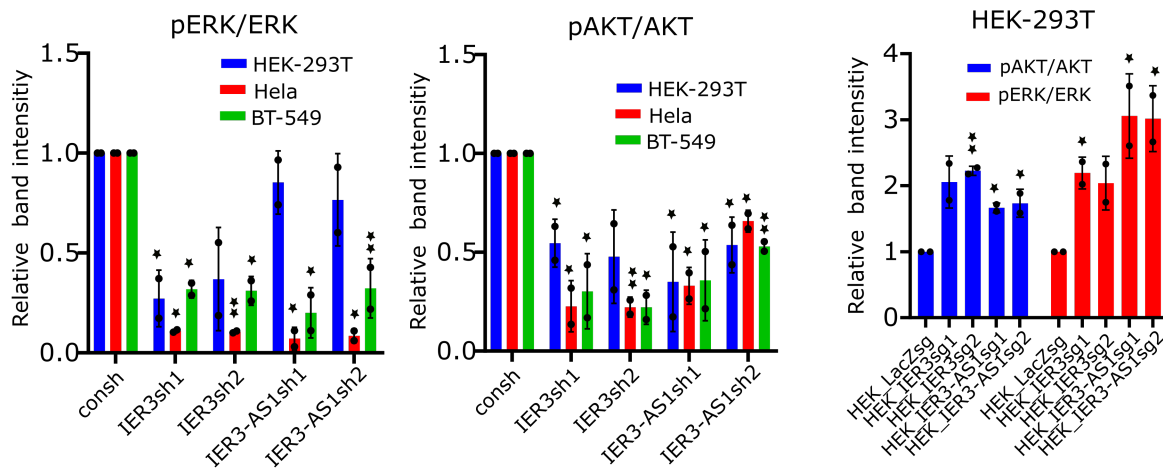

**Supplementary Figure 3:** a) Expression correlation plots of IER3 and IER3-AS1 in different cancers from TCGA. Correlation co-efficient and p value are mentioned above on each plot. b) RT-qPCR data of BT-549 cells following stable downregulation of IER3 and IER3 -AS1 using lentiviral sh RNAs. The values represent mean  $\pm$  SD of three independent biological replicates. \* $p < 0.05$ , \*\* $p < 0.01$  and \*\*\* $p < 0.001$  by two-sided Student's t test. c-d) RNAscope images of HeLa cells showing the significant reduction in the RNA fluorescence signals upon RNaseA treatment. IER3 -AS1 (Green) and IER3 (Red) transcripts in HeLa untreated and RNase A treated cells. DAPI was used to stain nucleus. Indicative scale bar on the images is 50 $\mu$ m. d) Graph showing significant reduction in the number of IER3-AS1 (left panel) and IER3 (right panel) RNA signals upon RNaseA treatment quantified as RNA spots per cell using Imaris spot detection tools. A total of untreated cells:  $n=113$ , and treated cells:  $n= 43$  for IER3-AS1, and for IER3, untreated:  $n=74$ , and treated:  $n= 36$  cells were counted from three independent experiments. Data represents  $\pm$ -SEM and p value were calculated by two-sided Student's t-test. e-f) Heatmaps show the expression (log<sub>2</sub>FC values) of protein coding (e) and non-coding (f) DEGs in IER3 and IER3 -AS1 KD HEK293 and HeLa cell lines. g) Log<sub>2</sub>FC values of IER3 and IER3-AS1 in RNA sequencing data of HEK293 and HeLa cell lines following stable KD of IER3 and IER3-AS1. The stars indicate the adjusted p-value of 0.05 by Benjamini-Hochberg method. \* $p < 0.05$ , \*\* $p < 0.01$  and \*\*\* $p < 0.001$ . h) Bar graphs showing the number of common and specific DEGs that are upregulated or downregulated in IER3 KD and IER3-AS1 KD HEK293 and HeLa cell lines. i) Histograms showing the relative band intensities from the Western blot (Figure 1 i). The data are presented  $\pm$  SD from two independent replicates and p values calculated using two-sided Student's t. \* $p \leq 0.05$ ; \*\* $p \leq 0.005$ ; \*\*\* $p \leq 0.0005$ .



# Supplementary Figure 4

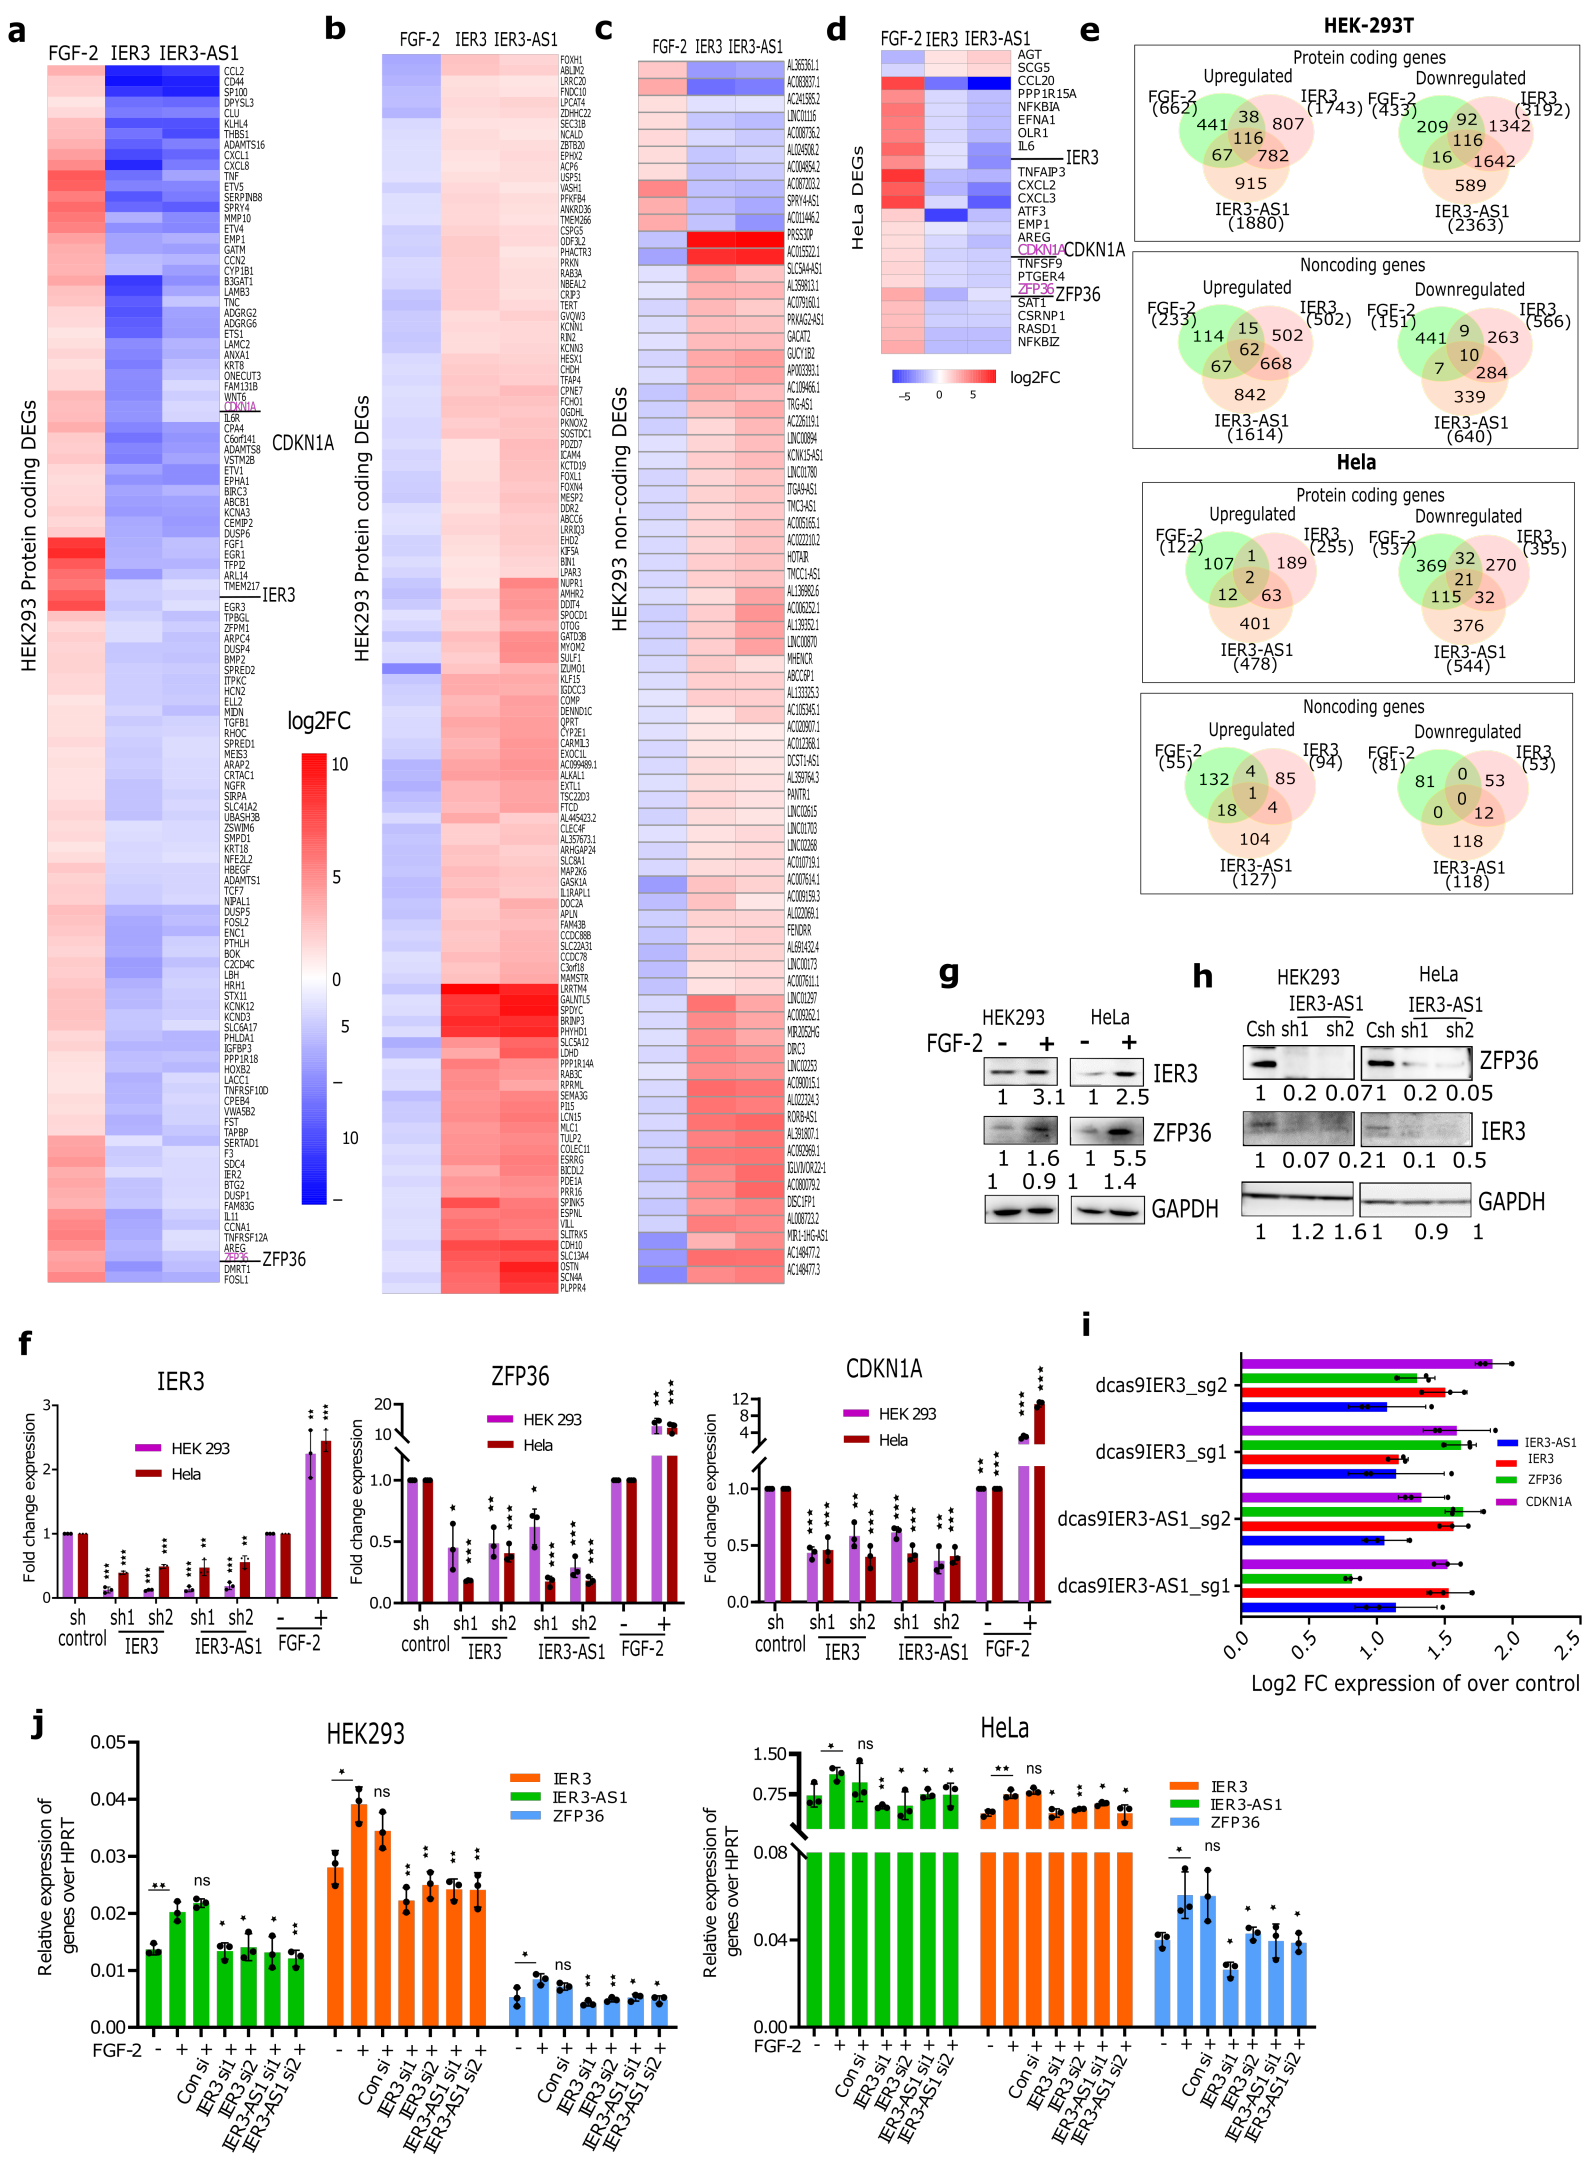

**Supplementary Figure 4:** a-b) Heatmaps showing the log<sub>2</sub>FC values of FGF-2 upregulated (a) and downregulated (b) protein coding genes in IER3-AS1 or IER3 KD HEK293 cells. c) Heatmaps showing the Log<sub>2</sub>FC values of FGF-2 upregulated and downregulated noncoding genes in IER3-AS1 or IER3 KD HEK293 cells. d) Heatmaps showing the Log<sub>2</sub>FC values of FGF-2 upregulated and downregulated protein coding genes in IER3-AS1 or IER3 KD HeLa cells. The bar scale shows the log<sub>2</sub>FC values with the indicated colors in the heatmaps. e) Venn diagrams show the overlap of FGF-2 regulated protein coding genes (upper panel) and non-coding genes (lower panel) with DEGs from IER3 or IER3-AS1 KD HeLa and HEK293 cells. f) Bar plots show RT-qPCR analysis of IER3 and its target genes in IER3 and IER3-AS1 stable KD or FGF-2 treatment in HeLa and HEK293 cell lines. g-h) Western blot analysis of IER3 and its indicated target genes upon FGF-2 treatment (g) or IER3 and IER3-AS1 KD (h) in HeLa and HEK293 cells. GAPDH was a loading control. The band intensities were quantified using ImageJ software and the values are mentioned below each band. Same results were observed in the independent biological replicate. i) RT-qPCR analysis showing log<sub>2</sub>FC expression levels of IER3 and its indicated target genes in HEK293 cells following activation of IER3 or IER3-AS1 using CRISPR/dCas9 activation system using IER3 and IER3-AS1 specific guide RNAs. LacZ guide RNA was used as a control. j) Bar graphs show RT-qPCR analysis of IER3 and its indicated target genes in HEK293 and HeLa cells treated with FGF-2 followed by IER3 or IER3-AS1 KD. The values represent mean ± SD of three independent biological replicates. \*p < 0.05, \*\*p < 0.01 and \*\*\*p < 0.001 by two-sided Student's t test for f, i and j.

# Supplementary Figure 5

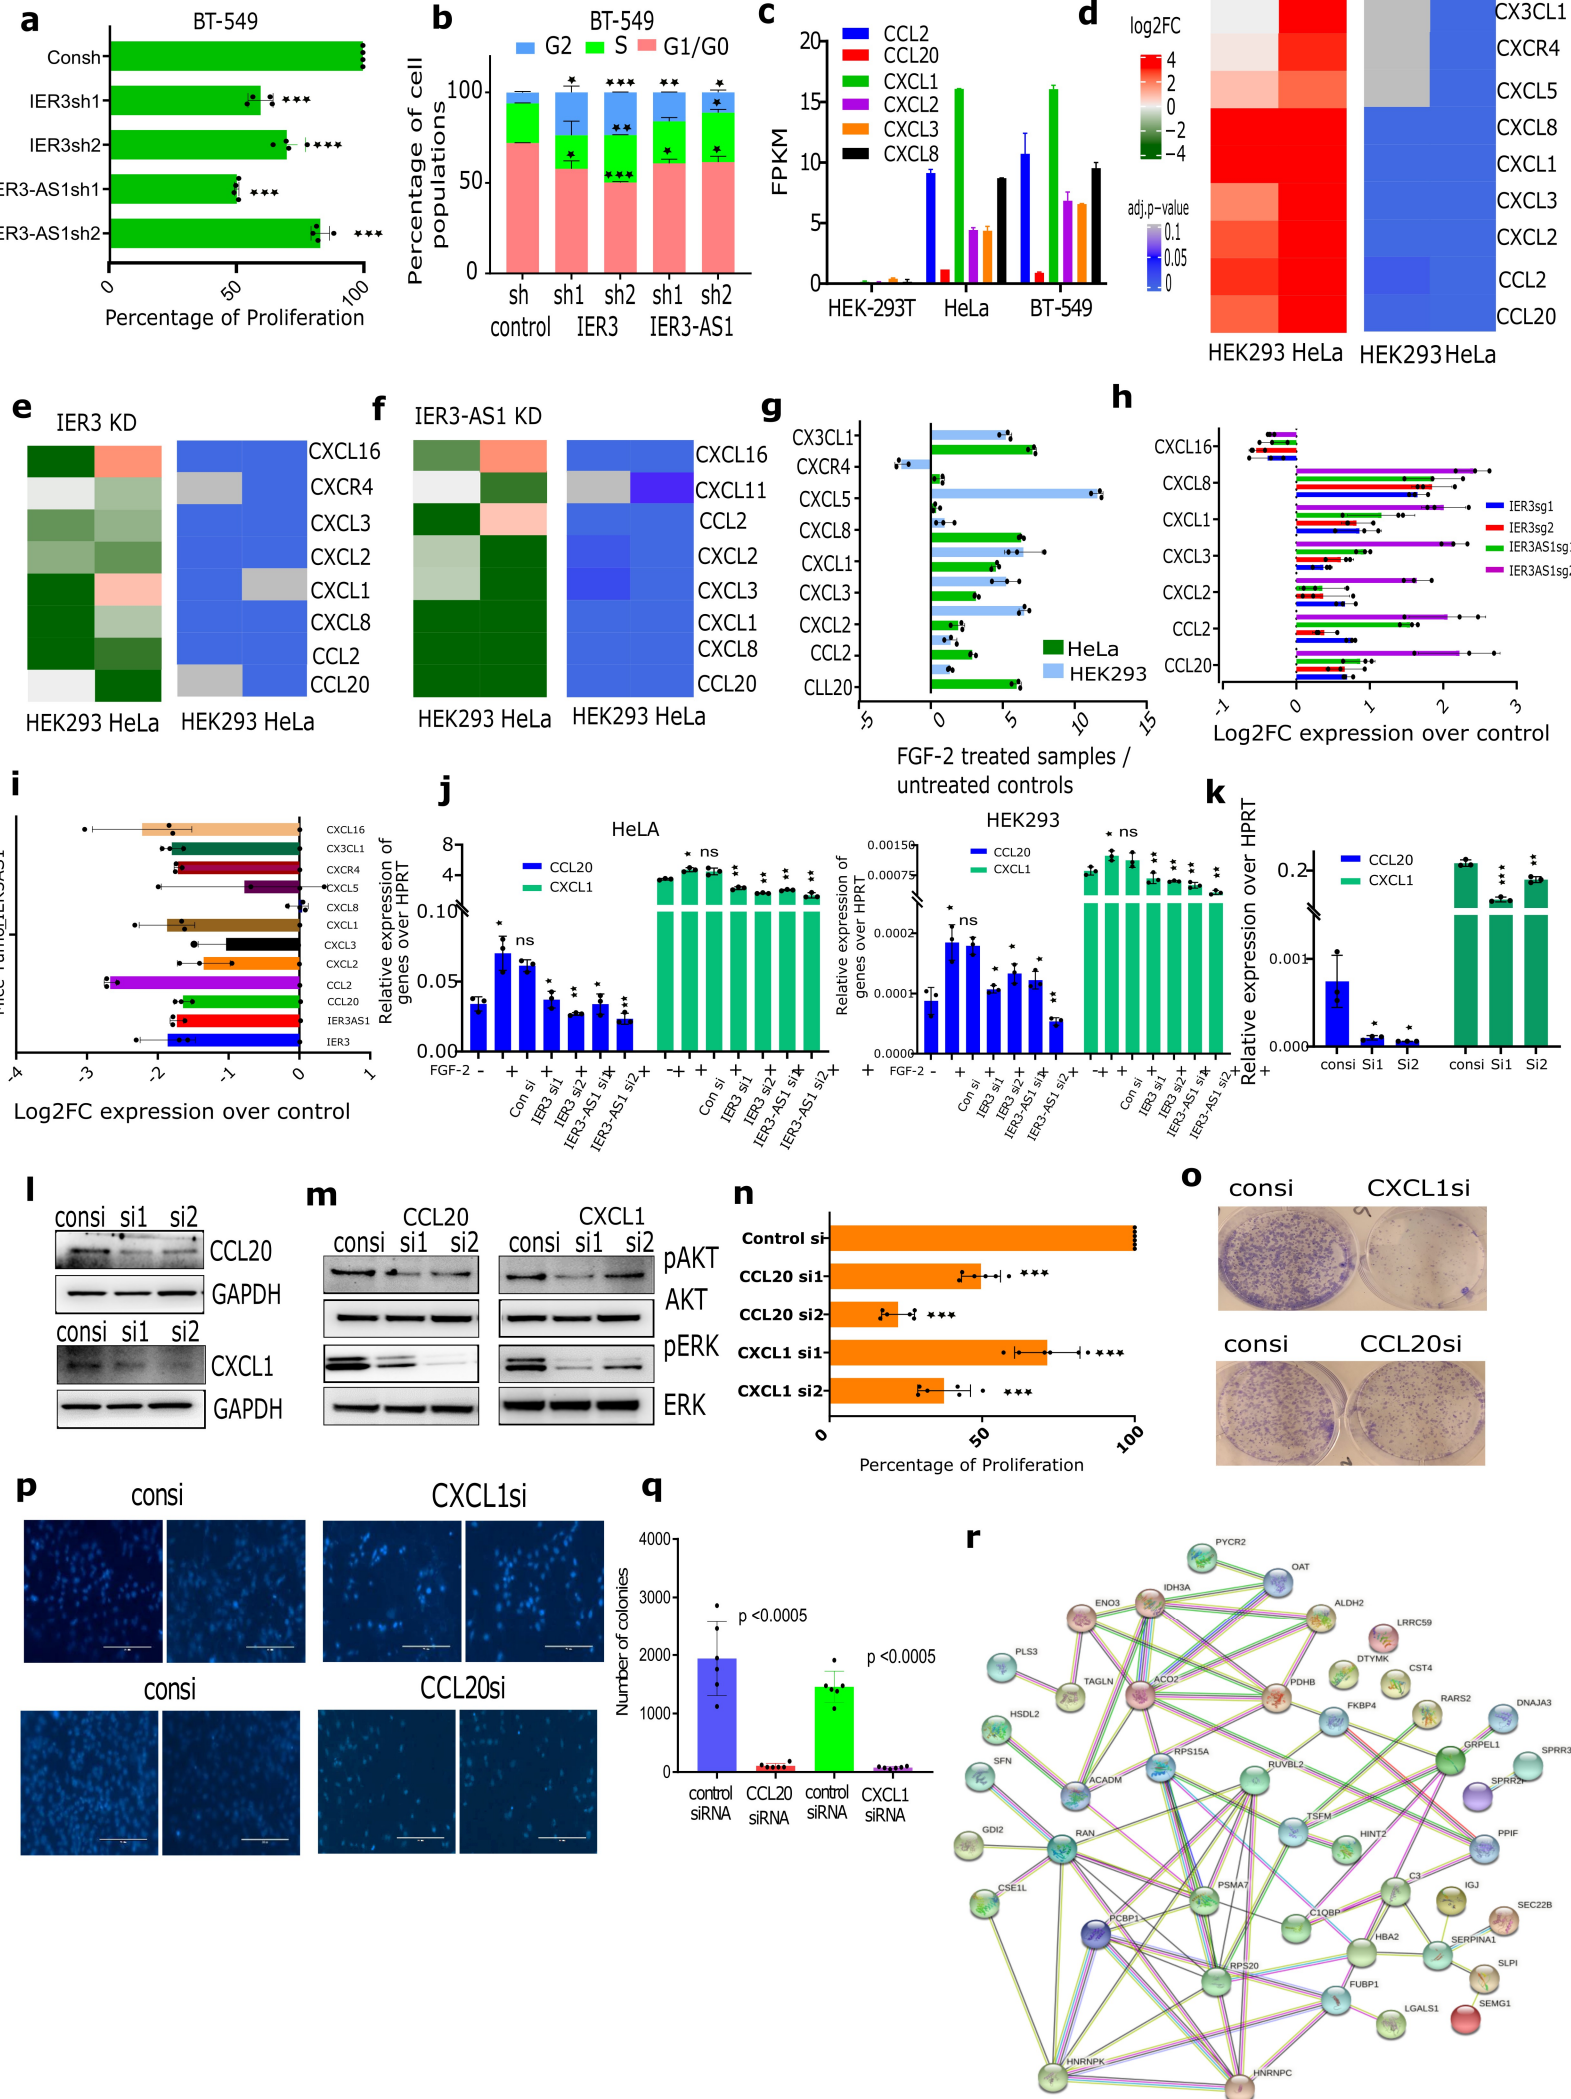

**Supplementary Figure 5:** a) Cell viability assay showing the percentage of proliferation for IER3 and IER3 -AS1 stable KD BT-549 cells. b) Distribution plots showing the percentage of cell populations of G0/G1, S and G2 phases of cell cycle in BT -549 cells. c) Basal expression levels of chemokines in the RNA sequencing data from HEK293, HeLa and BT -549 cell lines. d-f) Heatmaps showing the  $\log_2FC$  values of chemokines that were significantly upregulated by FGF-2 (d) and downregulated in IER3 KD (e) and IER3-AS1 KD (f) HeLa cells. The blue colored Heatmaps indicates p-value. The bars to the left side of the heatmaps show color code for upregulation, downregulation and p value. g-i) RT-qPCR validation of chemokine expression levels in FGF2 treated HeLa and HEK293 cells (g), CRISPR/dcas9 dependent activation of IER3 or IER3-AS1 in HEK293 cells (h), in xenografts (n =3) lacking IER3-AS1 (i). The bars represent the  $\log_2FC$  chemokine expression values over controls (n= 2 independent biological replicates). j) Expression levels of chemokines in HEK293 and HeLa cells treated with FGF-2 followed by IER3/IER3-AS1 KD using siRNAs. k) Expression values of chemokines in the indicated siRNAs treated samples, presented in relation to control siRNAs. l) Western blots showing the protein levels following their downregulation using siRNAs. m) Western blot analysis of protein levels in CCL20 and CXCL1 downregulated HeLa cells. n) Cell viability assay showing the percentage of cell proliferation of HeLa cells following CCL20 and CXCL downregulation. o) Colony forming efficiency of control and chemokine (CXCL1 and CCL20)KD HeLa cells. Similar results were obtained in the independent biological replicates for m-o. p) Invasion assay of HeLa cells depleted with CXCL1 and CCL20. q) Bar graphs showing quantification of the invasion assay in Supplementary Figure 5p (n= 2 independent biological replicates). r) Protein-protein interaction results obtained from STRING database for the top IER3-AS1 interacting proteins from ChOP-mass spectrometry data. For figures a, b, j, k and n. The values represent mean  $\pm$  SD of two biological experiments. \*p < 0.05, \*\*p < 0.01 and \*\*\*p < 0.001 by two-sided Student's t-test.



# Supplementary Figure S6

**A**

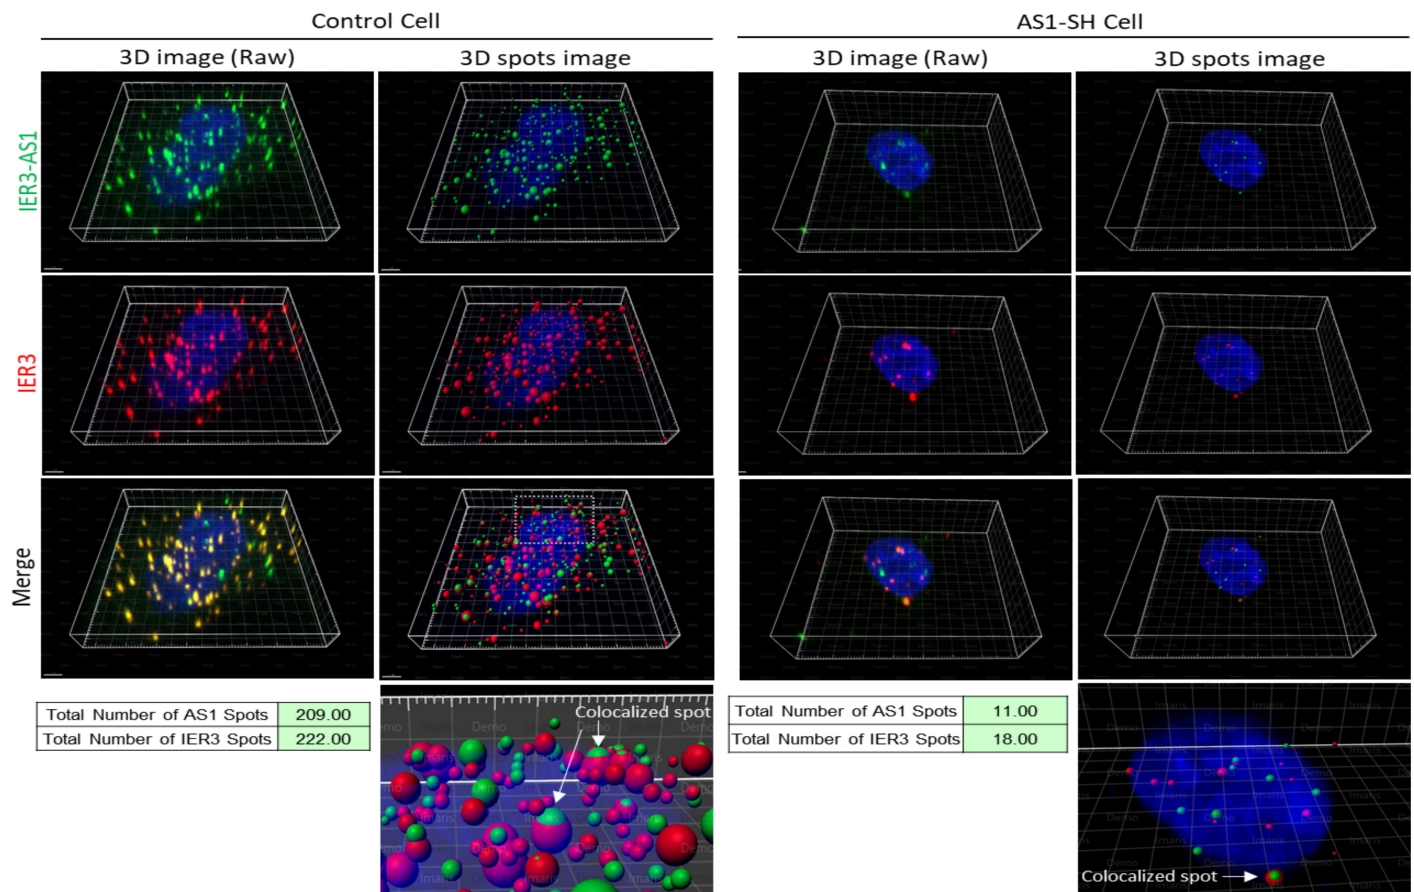

**B**

- 1
  - 2
  - 3
  - 4
  - 5
  - 6
- Measurement of average diameter of fluorescence signals**

  - Average diameter was measured using distance measurement tool in slice function.
  - 2025 fluorescence signal puncta were measured as shown in the following image, and average diameter was calculated.

**Spot creation using spot creation wizard**

  - Spots were created by following the 5 steps wizard given in the tool.
  - Different spot sizes and object statistics was selected for spot creation, shown in following screenshot.

**Selection of fluorescence channel and set up the estimated diameter for spot detection**

  - The calculated avg. diameter was used in the estimated XY diameter.
  - The source channel for spot detection were selected in which image has been acquired.
  - The background subtraction were selected in all conditions and replicates.

**Filtering the spots**

  - Quality based filter was applied to remove non-specific spots.
  - The value for the quality filter was selected by adjusting the slide graph (shown as green color graph in the following screenshot).
  - The disappearance of non specific spots was taken as a quality value and were kept constant in all conditions and replicates.

**Defining a spot region**

  - Absolute intensity was selected to define sphere volume.

**Wizard completion and exporting a statistic files**

  - The spot detection and creation of sphere was completed after defining a spot region (shown in the following screenshots).
  - All the statistics and values were exported in excel format for further analysis.

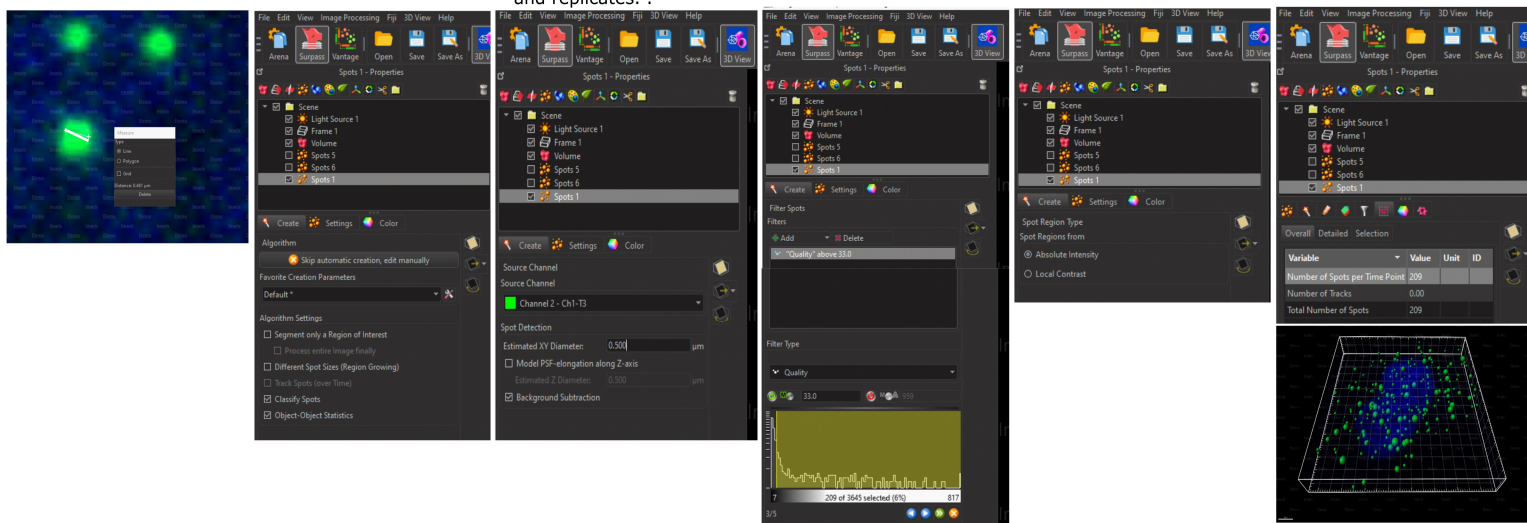

**Supplementary Figure S6:** A) RNAscope images of the 3D reconstructed cell (cropped raw confocal image) using Imaris(9.8.2 version) showing the IER3 (red) and IER3-AS1 (green) RNA signals in Control sh HeLa cells (left side of left panel) and IER3-AS1sh HeLa cells (left side of the right panel). Right side of the left panel, and right side of right panel showing detected spots using spot detection tool on a 3D reconstructed image: green sphere represents IER3-AS1 and red sphere represents IER3. Magnified area of co-localized spots was shown below the merged image depicted by white dotted box. Number of total spots detected by the spot detection tool were given below each respective panel and co-localized spots were shown by white arrows in the magnified image. B) Schematic workflow for the spot detection tool.

# Supplementary Figure 7

**a** FIMO Analysis (Find Individual Motif Occurrence)

| Sequence Name | Strand | Start | End  | p-value  | q-value | Matched Sequence |
|---------------|--------|-------|------|----------|---------|------------------|
| IER3-AS1      | +      | 9     | 13   | 0.000709 | 0.198   | CCTCC            |
| IER3          | +      | 91    | 95   | 0.000709 | 0.198   | CCTCC            |
| IER3-AS1      | -      | 337   | 341  | 0.000709 | 0.198   | CCTCC            |
| IER3-AS1      | +      | 351   | 355  | 0.000709 | 0.198   | CCTCC            |
| IER3          | +      | 357   | 361  | 0.000709 | 0.198   | CCTCC            |
| IER3-AS1      | +      | 399   | 403  | 0.000709 | 0.198   | CCTCC            |
| IER3-AS1      | +      | 415   | 419  | 0.000709 | 0.198   | CCTCC            |
| IER3          | +      | 473   | 477  | 0.000709 | 0.198   | CCTCC            |
| IER3          | +      | 789   | 793  | 0.000709 | 0.198   | CCTCC            |
| IER3          | -      | 952   | 956  | 0.000709 | 0.198   | CCTCC            |
| IER3          | -      | 968   | 972  | 0.000709 | 0.198   | CCTCC            |
| IER3          | -      | 1016  | 1020 | 0.000709 | 0.198   | CCTCC            |
| IER3          | +      | 1030  | 1034 | 0.000709 | 0.198   | CCTCC            |

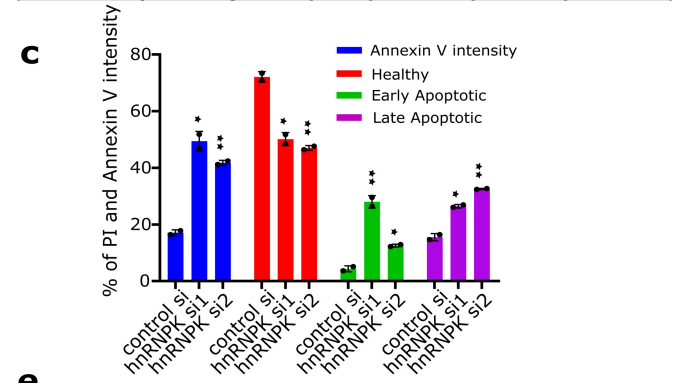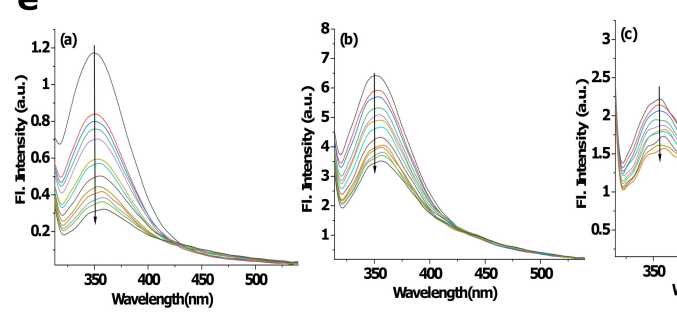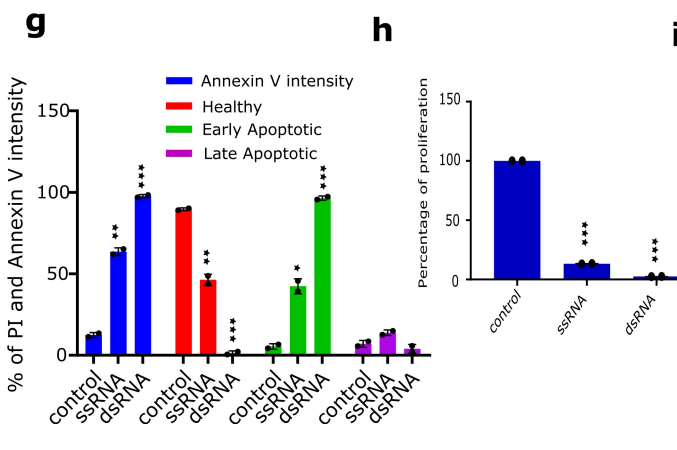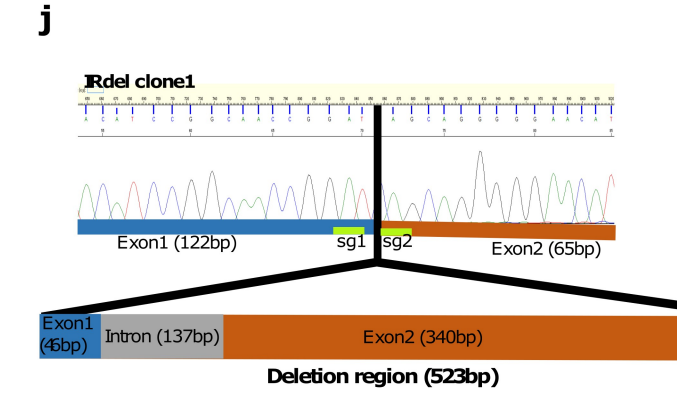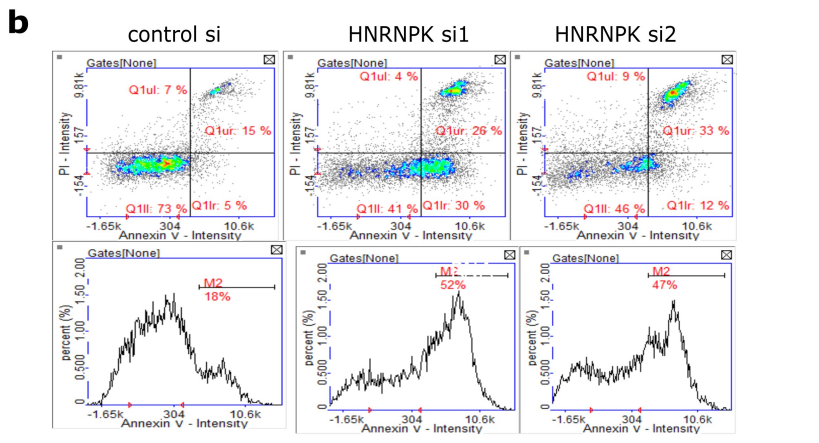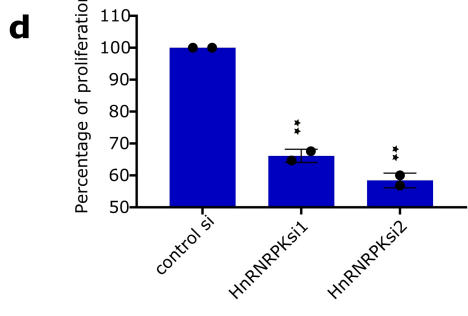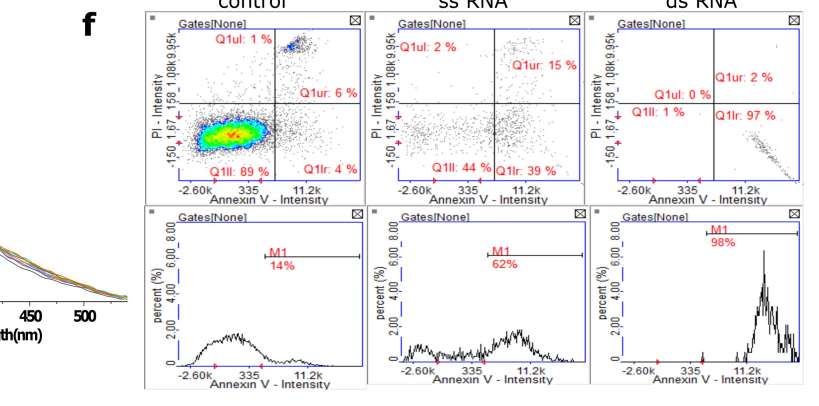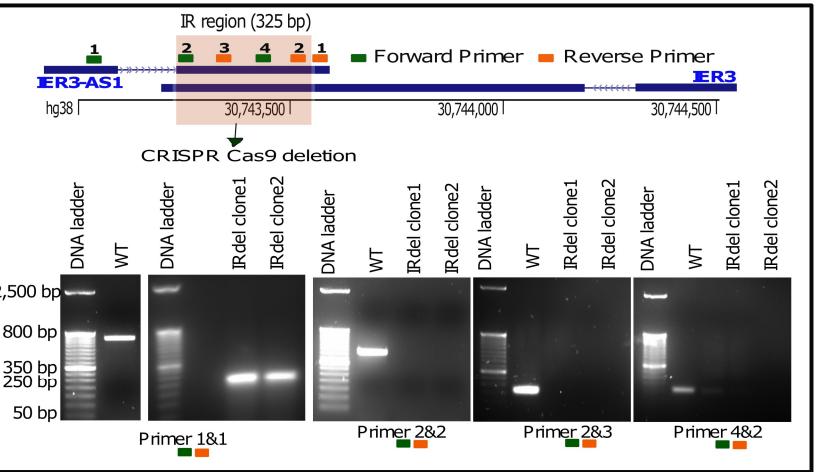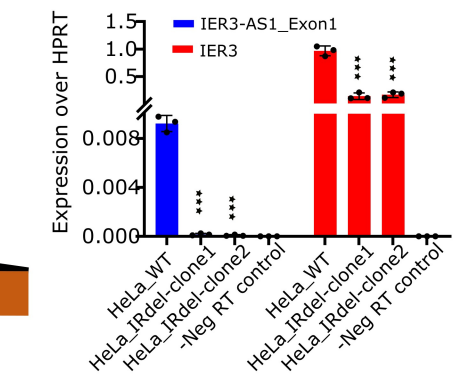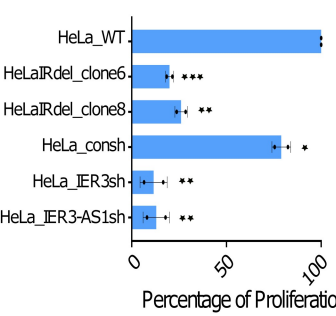



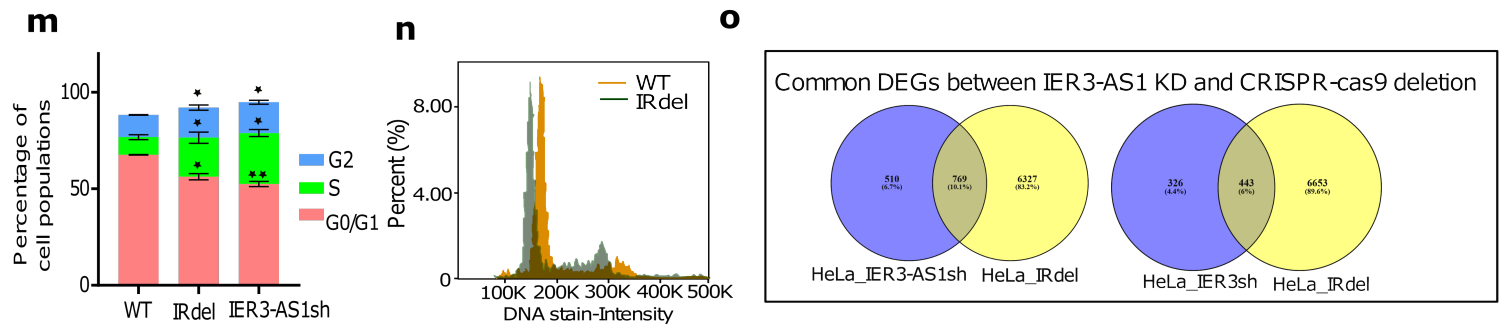

**Supplementary Figure 7:** a) Table showing the number and location of CCTCCC SIRLOIN motifs analyzed using FIMO. b and f) Scatter plots and histograms of Annexin V positive HeLa cells for control and hnRNPk si RNA samples (b) and *in vitro* transcribed ssRNA (IR region in IER3 -AS1 orientation) and annealed IER3/IER3-AS1 dsRNA (IR region transcribed in both IER3 and IER3-AS1 orientations) (f). Cells were stained with Annexin V - Fluorescein Isothiocyanate conjugated antibody and propidium iodide and analyzed using NucleoCounter NC - 3000. In the right two quadrants, ur and lr show the percentage of Annexin V and PI positive cells. c and g) The bar plots showing the Annexin V intensities based on the scatter plots and histograms shown in Supplementary Fig 7b and 7f, respectively. d and h) Cell proliferation potential of HeLa cells following hnRNPk KD(d) and ssRNA/dsRNA transfected HeLa cells(h). e) Tryptophan fluorescence spectra of the H nRNPk protein with increasing amount of IER3, IER3-AS1 and IER3/IER3-AS1 dsRNA. i) The schematic representation of IR and the location of the primer sequences used for checking the CRISPR targeted deletion of IR region. Below the schematic is agarose gel showing the PCR amplification of the IR region for wild-type and CRISPR deleted clones using different combinations of the primer sets as indicated in the schematic diagram. j) Sanger sequencing data for the HeLa CRISPR deleted IR clone showing the exact location and the size of the deleted region. k) Expression of IER3 - AS1 and IER3 in control HeLa cells and HeLa IR CRISPR deleted clones. l) Cell viability assay showing the percentage of proliferation for the IRdel stable cell clones compared to the IER3 -AS1sh and IER3sh stable knockdown cells. m-n) showing distribution plots of different cell cycle phases (m) and histograms showing shift in the S phase (n) in control HeLa and HeLa-IRdel cell clones. o) Venn diagrams showing the overlap of common DEG from RNA-sequencing data. For figures c, d, g, h, k, l and m the values represent mean  $\pm$  SD of two (figure k, n =3) biological experiments. \*p < 0.05, \*\*p < 0.01 and \*\*\*p < 0.001 by two-sided Student's t test.

# Supplementary Figure 8

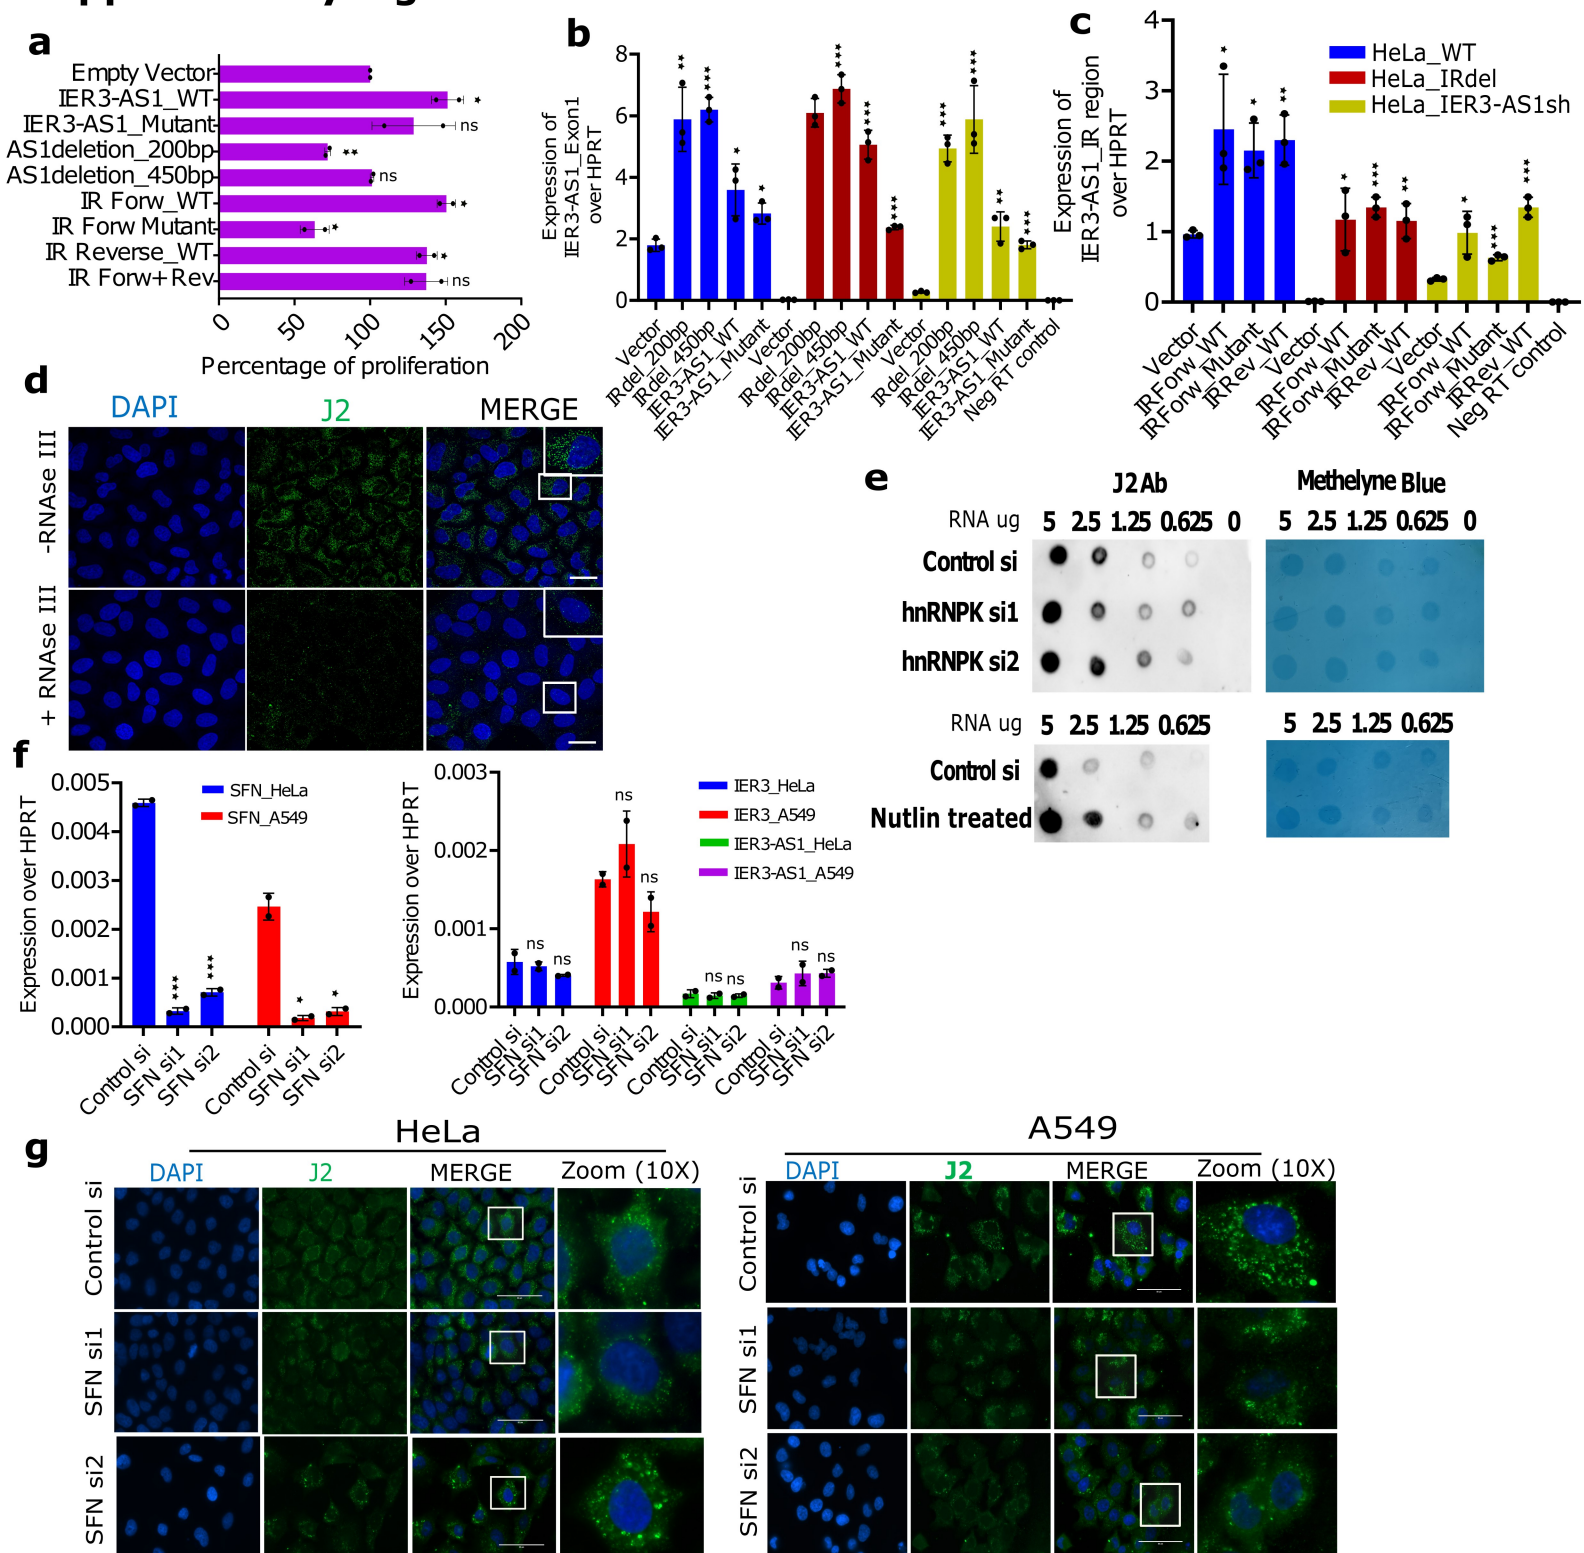

**Supplementary Figure 8:** a) Percentage of cell viability of IER3-AS1sh cell line transfected with various plasmids containing wild type, IER3-AS1 deletion and IER3-AS1 mutant clones (CCTCC motifs mutated to AAGAA). b and c) Expression levels of IER3-AS1 exon1 (b) and IR region (c) from total RNA obtained from HeLa\_WT, HeLa\_IRdel and HeLa\_IER3-AS1sh cell lines transfected with various wild-type, IER3-AS1 deletions and IER3-AS1 SIRLOIN mutant. d) Immunofluorescence Images of HeLa cells showing decrease in J2-dsRNA specific signals (green) in RNase III treated HeLa cells. The panels to the right show merged images. Magnified J2 signals (puncta) were shown in an inset at the upper right corner indicated by white box. DAPI staining was used to locate the nucleus. Indicative scale bar on the images is 50um. e) Dot blots showing double strand RNA (dsRNA) levels in HeLa cells treated with control si or hnRNPKsi. Total RNA from control siRNA or hnRNPK siRNA treated cells was loaded onto a nylon membrane in a dilution series of 5000, 2500, 1250 and 625 ng per dot. Membranes were then probed with dsRNA-specific J2 antibody. The lower panel shows methylene blue staining of the blot from the upper panel to control for the loading of the indicated RNA amounts. HeLa cells treated with Nutlin-3a RNA samples were shown as a positive control for J2 antibody. f) Expression levels of SFN, IER3 and IER3-AS1 in control and SFN downregulated HEK293 and HeLa cells. SFN was downregulated using siRNAs. g) Representative IF images showing J2 staining (green) following SFN siRNA and control siRNA treatment of HeLa cells. DAPI staining was used to locate the nucleus. The panel to extreme right show the magnified images (10X zoom) highlighting the areas marked in white color boxes from the merged panel. Figures d, e and g were performed in two biological replicates and similar results were obtained. For the figures, a, b, c and f the values represent mean  $\pm$  SD of three biological experiments. \* $p < 0.05$ , \*\* $p < 0.01$  and \*\*\* $p < 0.001$  by two-sided Student's t test.



**Supplementary Table 1 – List of RT-PCR primers used in this study**

| Gene      | Primer sequences (5'-3')                            |
|-----------|-----------------------------------------------------|
|           |                                                     |
| IER3      | 5' TCTTCACCTTCGACCCTCTC 3'(Forward primer)          |
|           | 5' ACACCCTCTTCAGCCATCAG 3' (Reverse primer)         |
| IER3-AS1  | 5' GGATGCTGGGTCTGTGACT 3'(Forward primer)           |
|           | 5' GCGGACCATTAGGAATGAGA 3' (Reverse primer)         |
| HPRT      | 5' GCTATAAATTCTTTGCTGACCTG 3'(Forward primer)       |
|           | 5' AATTACTTTTATGTCCCCTGTTGACTGG 3' (Reverse primer) |
| GAPDH     | 5' TAAAAGCAGCCCTGGTGAC 3'(Forward primer)           |
|           | 5'CTCTGCTCCTCTGTTTCGAC 3' (Reverse primer)          |
| ZFP36     | 5' ACTTCAGCGCTCCCACTCT 3'(Forward primer)           |
|           | 5' GACTCAGTCCCTCCATGGTC 3' (Reverse primer)         |
| CDKN1A    | 5' GGAAGACCATGTGGACCTGT 3'(Forward primer)          |
|           | 5' GGATTAGGGCTTCCTCTTGG 3' (Reverse primer)         |
| AL121603  | 5' CCGGCTCTTACTCGTAGTGG 3'(Forward primer)          |
|           | 5' ACCTTACCGGCTTTCCTTTC 3'(Reverse primer)          |
| AC005077  | 5' CAGCTGTGGCCTCACATTG 3'(Forward primer)           |
|           | 5' ATCGGGACACAGGAGCTG 3' (Reverse primer)           |
| AL357060  | 5' AACCTCTGCAGCAGTGACCT 3'(Forward primer)          |
|           | 5' CAGCCCAAACCTTTCAGAGC 3' (Reverse primer)         |
| AC145422  | 5' GCAAGGGGAGCAGATAGATG 3'(Forward primer)          |
|           | 5' GGATGAGAGCCAACGTCTTC 3' (Reverse primer)         |
| TDH       | 5' GCTCCAACCTCTGGGTCGTA 3'(Forward primer)          |
|           | 5' CTGTGGCCTCTACTCACTCG 3' (Reverse primer)         |
| STPG3-AS1 | 5' GGAGGCCATGGTTCCACT 3'(Forward primer)            |
|           | 5' CCTGGCTCAGCACCTGTAAG 3' (Reverse primer)         |
| P65       | 5' GGCATCCGTCGACAACTCCG 3'(Forward primer)          |
|           | 5' CCTGAAAGGAGGCCATTGGGG 3' (Reverse primer)        |
| CCL20     | 5' CAGCACTCCCAAAGAACTGG 3'(Forward primer)          |
|           | 5' CGTGTGAAGCCCACAATAAA 3' (Reverse primer)         |
| CCL2      | 5' GCCTCCAGCATGAAAGTCTC 3'(Forward primer)          |
|           | 5' CAGATCTCCTTGGCCACAAT 3' (Reverse primer)         |
| CXCL2     | 5' CTCAAGAATGGGCAGAAAGC 3'(Forward primer)          |
|           | 5' AAACACATTAGGCGCAATCC 3' (Reverse primer)         |
| CXCL3     | 5' CCCCATGGTTCAGAAAATCA 3'(Forward primer)          |
|           | 5' CCTTTCAGCTGTCCCTAGA 3' (Reverse primer)          |
| CXCL16    | 5' GAAAGCTTGCCCTCAATCCTG 3'(Forward primer)         |
|           | 5' TCCTAAGCGATGCTCAAACA 3' (Reverse primer)         |
| CXCL8     | 5' AAGAAACCACCGGAAGGAAC 3'(Forward primer)          |
|           | 5' AAATTTGGGGTGGAAAGGTT 3' (Reverse primer)         |
| CXCL5     | 5' CCACTATGAGCCTCCTGTCC 3'(Forward primer)          |
|           | 5' CTATGGCGAACACTTGCAGA 3' (Reverse primer)         |
| CXCR4     | 5' CAGCAGGTAGCAAAGTGACG 3'(Forward primer)          |
|           | 5' GTAGATGGTGGGCAGGAAGA 3' (Reverse primer)         |

|             |                                                              |
|-------------|--------------------------------------------------------------|
| CX3CL1      | 5' GGCTCCGATATCTCTGTCGT 3'(Forward primer)                   |
|             | 5' CATGATGCCTGGTTCTGTTG 3' (Reverse primer)                  |
| CXCL16      | 5' CCATGGGTTTCAGGAATTGAT 3'(Forward primer)                  |
|             | 5' CAAGGTGGACAGGAGCATCT 3' (Reverse primer)                  |
| hnRNPK      | 5' AGCACTGCAGACGCCATTAT 3'(Forward primer)                   |
|             | 5' TCCTTGCAGAGCAGAACTGA 3' (Reverse primer)                  |
| hnRNPC      | 5' CAGCAGCCAGGATGACCT 3'(Forward primer)                     |
|             | 5' CCCAATGAATACACGGGAGT 3' (Reverse primer)                  |
| NEAT1       | 5' CAGTTAGTTTATCAGTTCTCCCATCCA 3'(Forward primer)            |
|             | 5' GTTGTTGTCGTCACCTTTCAACTCT 3' (Reverse primer)             |
| ERVL        | 5' ATATCCTGCCTGGATGGGGT 3'(Forward primer)                   |
|             | 5' GAGCTTCTTAGTCCTCCTGTGT 3' (Reverse primer)                |
| MTL2B4      | 5' GGAGAAGCTGATGGTGCAGA 3'(Forward primer)                   |
|             | 5' ACCAACCTTCCCAAGCAAGA 3' (Reverse primer)                  |
| IER3-AS1_IR | 5' GCGGCGGGTACCCAGGGAGAACATACTAGGCGATC 3'(Forward primer)    |
|             | 5' GCGGCGGGATCCCTCTTGGTATTTATTGAGCTTTGT 3' (Reverse primer)  |
| IER3_IR     | 5'GCGGCGGGTACCAGGTCTCTTGGTATTTATTGAGCTTT 3'(Forward primer)  |
|             | 5'GCGGCGGGATCCAGGGAGAACATACTAGGCGATCTCGAC 3'(Forward primer) |

**Supplementary Table 2 – List of Primers used for checking CRISPR-cas9 IR deletion and amplifying wild type and mutant sequences**

| Primers               | Primer sequences (5'-3')                                 |
|-----------------------|----------------------------------------------------------|
|                       |                                                          |
| IER3-AS1IR_Upst_Dnst  | 5' CGTAAGGGTGATTGCCACAT 3'(Forward primer)               |
|                       | 5' CGTCCTCCTAGGTGATGGAG 3' (Reverse primer)              |
| IER3-AS1_IR_5' region | 5' ATGCTGGGTTCTGTGACTCC 3'(Forward primer)               |
|                       | 5' CCACTGTGAGATCGCCTA 3' (Reverse primer)                |
| IER3-AS1_IR_3' region | 5' CGCCGAAGTCTCACACAGTA 3'(Forward primer)               |
|                       | 5' ACTGCGGCAAAGTAGGAGAA 3' (Reverse primer)              |
| IER3-AS1_200bp        | 5' TAAGCAAAGCTTGGGTGAGGGACTTGACCTC 3'(Forward primer)    |
|                       | 5' TGCTTAGCGGCCGCACGGAGCGACTGTCGAGAT 3' (Reverse primer) |
| IER3-AS1_450bp        | 5' TAAGCAAAGCTTGGGTGAGGGACTTGACCTC 3'(Forward primer)    |
|                       | 5' TGCTTAGCGGCCGCTGGAAGTGCAGCAAAGTAG 3' (Reverse primer) |
| IER3-AS1_Full length  | 5' TAAGCAAAGCTTGGGTGAGGGACTTGACCTC 3'(Forward primer)    |
|                       | 5' TGCTTAGCGGCCGCTCCTCCTAGGTGATGGAG 3' (Reverse primer)  |

|                  |                                                                   |
|------------------|-------------------------------------------------------------------|
| IER3-AS1_IR forw | 5' GCGGCGGGTACCCAGGGAGAACATACTAGGCGATC<br>3'(Forward primer)      |
|                  | 5' GCGGCGGGATCCCTCTTGGTATTTATTGAGCTTTGT 3'<br>(Reverse primer)    |
| IER3-AS1_IR Rev  | 5' GCGGCGGGTACCAGGTCTCTTGGTATTTATTGAGCTTT<br>3'(Forward primer)   |
|                  | 5' GCGGCGGGATCCAGGGAGAACATACTAGGCGATCTCGAC 3'<br>(Reverse primer) |

**Supplementary Table 3 – List of shRNAs, sgRNAs, siRNAs and Oligos used for ChIRP assay**

| <b>shRNAs target sequence</b>                                     |                |                         |
|-------------------------------------------------------------------|----------------|-------------------------|
| <b>Name</b>                                                       | <b>Company</b> | <b>Target Sequence</b>  |
| IER3_Oligo2_S                                                     | Sigma Aldrich  | GGGCTCCGAAGTCAGATTA AAA |
| IER3_Oligo2_AS                                                    | Sigma Aldrich  | GGGCTCCGAAGTCAGATTA AAA |
| IER3_Oligo3_S                                                     | Sigma Aldrich  | GGTACGCCTGGTGTTCCTTTG   |
| IER3_Oligo3_AS                                                    | Sigma Aldrich  | GGTACGCCTGGTGTTCCTTTG   |
| IER3AS1_Oligo2_S                                                  | Sigma Aldrich  | TGATTGCCACATCTCGGATTC   |
| IER3AS1_Oligo2_AS                                                 | Sigma Aldrich  | TGATTGCCACATCTCGGATTC   |
| IER3AS1_Oligo3_S                                                  | Sigma Aldrich  | ACCGCAGACTGGGCAATGAAA   |
| IER3AS1_Oligo3_AS                                                 | Sigma Aldrich  | ACCGCAGACTGGGCAATGAAA   |
| Control shRNA particle from Sigma Aldrich                         |                |                         |
| <b>sgRNAs target sequence</b>                                     |                |                         |
| <b>Name</b>                                                       | <b>Company</b> | <b>Target Sequence</b>  |
| IER3-AS1sg1                                                       | Sigma Aldrich  | TCGCGTCTGCCGCAGCAACG    |
| IER3-AS1sg2                                                       | Sigma Aldrich  | CTCACCTTCCGGGACGCGGG    |
| IER3-AS1sg3                                                       | Sigma Aldrich  | GGAAGGGCGGGGTCGCGCA     |
| IER3sg1                                                           | Sigma Aldrich  | AAATTCCGACGATTAACAA     |
| IER3sg2                                                           | Sigma Aldrich  | ACACACTCACAACGTGCAGT    |
| IER3sg3                                                           | Sigma Aldrich  | CAGGCACATGTCGAGGCATG    |
| <b>3'-biotin-TEG modified oligos for modified ChIRP-mass spec</b> |                |                         |
| <b>Name</b>                                                       | <b>Company</b> | <b>Target Sequence</b>  |
| IER3-AS1_Probe1                                                   | Sigma Aldrich  | aatccgagatgtggcaatca    |
| IER3-AS1_Probe2                                                   | Sigma Aldrich  | tttctctggagtcacagaac    |
| IER3-AS1_Probe3                                                   | Sigma Aldrich  | gaatgagatccgtgagatcc    |
| IER3-AS1_Probe4                                                   | Sigma Aldrich  | ggtcgtaagtttaggaggtg    |
| IER3-AS1_Probe5                                                   | Sigma Aldrich  | aatgcaggtctcttggtatt    |
| IER3-AS1_Probe6                                                   | Sigma Aldrich  | ggttttccaggtagttgcc     |
| IER3-AS1_Probe7                                                   | Sigma Aldrich  | tagtatgttctccctgggcc    |
| IER3-AS1_Probe8                                                   | Sigma Aldrich  | gaggtagagggttgggggt     |
| LacZ_Probe1                                                       | Sigma Aldrich  | TCACGACGTTGTAAAACGAC    |
| LacZ_Probe2                                                       | Sigma Aldrich  | ATTAAGTTGGGTAACGCCAG    |
| LacZ_Probe3                                                       | Sigma Aldrich  | AGGTTACGTTGGTGTAGATG    |

|                                 |                |                        |
|---------------------------------|----------------|------------------------|
| LacZ_Probe4                     | Sigma Aldrich  | AATGTGAGCGAGTAACAACC   |
| LacZ_Probe5                     | Sigma Aldrich  | GTAGCCAGCTTTCATCAACA   |
| LacZ_Probe6                     | Sigma Aldrich  | AATAATTCGCGTCTGGCCTT   |
| LacZ_Probe7                     | Sigma Aldrich  | AGATGAAACGCCGAGTTAAC   |
| LacZ_Probe8                     | Sigma Aldrich  | AATTCAGACGGCAAACGACT   |
| <b>siRNA from sigma aldrich</b> |                |                        |
| <b>Name</b>                     | <b>Company</b> | <b>Target Sequence</b> |
| IER3-AS1 siRNA1                 | Sigma Aldrich  | GTGATTGCCACATCTCGGA    |
| IER3-AS1 siRNA2                 | Sigma Aldrich  | GATGCTGGGTCTGTGACT     |
| IER3-AS1 siRNA3                 | Sigma Aldrich  | GGTTCTGTGACTCCAGGA     |
| IER3 siRNA1                     | Sigma Aldrich  | CTGGTGTTCCTTTGTGGTT    |
| IER3 siRNA2                     | Sigma Aldrich  | CGCTGTAGTGTTCTGAGTT    |
| IER3 siRNA3                     | Sigma Aldrich  | GTGCTGAGGTCCAGAGCGT    |
| CCL20 siRNA1                    | Sigma Aldrich  | SASI_Hs01_00124576     |
| CCL20 siRNA2                    | Sigma Aldrich  | SASI_Hs01_00124577     |
| CCL20 siRNA3                    | Sigma Aldrich  | SASI_Hs01_00124578     |
| CXCL1 siRNA1                    | Sigma Aldrich  | SASI_Hs01_00095009     |
| CXCL1 siRNA2                    | Sigma Aldrich  | SASI_Hs01_00095011     |
| CXCL1 siRNA3                    | Sigma Aldrich  | SASI_Hs02_00332014     |
| hnRNPK siRNA1                   | Sigma Aldrich  | SASI_Hs02_00358665     |
| hnRNPK siRNA2                   | Sigma Aldrich  | SASI_Hs02_00358664     |
| hnRNPK siRNA3                   | Sigma Aldrich  | SASI_Hs02_00358662     |
| hnRNPC siRNA1                   | Sigma Aldrich  | SASI_Hs02_00337755     |
| hnRNPC siRNA2                   | Sigma Aldrich  | SASI_Hs01_00010782     |
| hnRNPC siRNA3                   | Sigma Aldrich  | SASI_Hs02_00337754     |
| SFN siRNA1                      | Sigma Aldrich  | SASI_Hs01_00189928     |
| SFN siRNA2                      | Sigma Aldrich  | SASI_Hs01_00189929     |
| Mission siRNA negative control  | Sigma Aldrich  | S1C001                 |



**Supplementary Table 4 – List of Plasmids, Drugs, reagents and software and algorithms used.**

| <b>Plasmids from addgene</b>                           |                          |                                                                                                                       |
|--------------------------------------------------------|--------------------------|-----------------------------------------------------------------------------------------------------------------------|
| <b>Name</b>                                            | <b>Company</b>           | <b>Identifier</b>                                                                                                     |
| T7-RELA                                                | Addgene                  | #21984                                                                                                                |
| T7-RELA(S276A)                                         | Addgene                  | #24154                                                                                                                |
| PLKO.TRC (cloning vector for shRNA)                    | Addgene                  | #10878                                                                                                                |
| LentisgRNA(MS2)Zeo (Cloning vector for sgRNA)          | Addgene                  | #61427                                                                                                                |
| Lenti dCAS9-VP64-Blast                                 | Addgene                  | #61425                                                                                                                |
| lentiMPH v2                                            | Addgene                  | #89308                                                                                                                |
| <b><u>Drugs and Reagents</u></b>                       |                          |                                                                                                                       |
| <b>Antibodies</b>                                      | <b>Company</b>           | <b>Identifier</b>                                                                                                     |
| Nutlin-3a                                              | Selleckchem              | S8059                                                                                                                 |
| FGF-2                                                  | Sigma Aldrich            | SRP4037                                                                                                               |
| ActinomycinD                                           | Sigma Aldrich            | A1410                                                                                                                 |
| Methylene Blue                                         | Sigma Aldrich            | M9140-25G                                                                                                             |
| Corning Matrigel                                       | Thermofischer Scientific | 11573620                                                                                                              |
| RIPA lysis Buffer                                      | Sigma Aldrich            | R0278                                                                                                                 |
| Protease & Phosphatases inhibitor cocktail             | Thermofischer Scientific | 78446                                                                                                                 |
| Skim Milk powder                                       | Sigma Aldrich            | 70166                                                                                                                 |
| SuperSignal™ West Pico PLUS Chemiluminescent Substrate | Thermofischer Scientific | 34580                                                                                                                 |
| Lipofectamine RNAi max                                 | Thermofischer Scientific | 10601435                                                                                                              |
| Lipofectamine 2000                                     | Thermofischer Scientific | 12313563                                                                                                              |
| <b><u>Software and algorithms</u></b>                  |                          |                                                                                                                       |
| <b>Softwares</b>                                       | <b>Company</b>           | <b>Identifier</b>                                                                                                     |
| GraphPad Prism                                         | GraphPad                 | <a href="https://www.graphpad.com/scientific-software/prism/">https://www.graphpad.com/scientific-software/prism/</a> |
| ImageJ                                                 | NIH                      | <a href="https://imagej.nih.gov/ij/">https://imagej.nih.gov/ij/</a>                                                   |

|                               |                    |                                                                                                                                                                                                                                                                                                                                                                               |
|-------------------------------|--------------------|-------------------------------------------------------------------------------------------------------------------------------------------------------------------------------------------------------------------------------------------------------------------------------------------------------------------------------------------------------------------------------|
| Chemotaxis and Migration tool | Ibidi              | <a href="https://ibidi.com/chemotaxis-analysis/171-chemotaxis-and-migration-tool.html?gclid=Cj0KCQiA-qGNBhD3ARIsAO_o7yndTirYiAYt_Zf6zSAEzHiwNrE-g1XQqNRJa-ly0-ScW1ZVQaoloIMaAi1fEALw_wcB">https://ibidi.com/chemotaxis-analysis/171-chemotaxis-and-migration-tool.html?gclid=Cj0KCQiA-qGNBhD3ARIsAO_o7yndTirYiAYt_Zf6zSAEzHiwNrE-g1XQqNRJa-ly0-ScW1ZVQaoloIMaAi1fEALw_wcB</a> |
| Inkscape                      | N/A                | <a href="https://inkscape.org/release/0.92.3/windows/">https://inkscape.org/release/0.92.3/windows/</a>                                                                                                                                                                                                                                                                       |
| Zen                           | Zeiss              | <a href="https://www.zeiss.com/microscopy/int/products/microscope-software/zen.html">https://www.zeiss.com/microscopy/int/products/microscope-software/zen.html</a>                                                                                                                                                                                                           |
| IMARIS Imaging software       | Oxford instruments | <a href="https://imaris.oxinst.com/products/imaris-for-cell-biologists?gclid=Cj0KCQiA-qGNBhD3ARIsAO_o7ykO6PENdQyqCHZLUUsQkyen95EerGxIgojUsDutTgvZzha_sqTTuhsaAmV8EALw_wcB">https://imaris.oxinst.com/products/imaris-for-cell-biologists?gclid=Cj0KCQiA-qGNBhD3ARIsAO_o7ykO6PENdQyqCHZLUUsQkyen95EerGxIgojUsDutTgvZzha_sqTTuhsaAmV8EALw_wcB</a>                               |

**Supplementary Table 5 – List of Antibodies and dilutions used for western blot, ChRIP, dot blot, Immunostaining and IHC experiments.**

| Western blot antibodies |                    |             |          |
|-------------------------|--------------------|-------------|----------|
| Antibodies              | Company            | Catalog No. | Dilution |
| pAKT (Ser473)           | cell signaling     | 4060S       | 1:2000   |
| AKT                     | cell signaling     | 4691S       | 1:1000   |
| pERK                    | cell signaling     | 9101S       | 1:1000   |
| ERK                     | cell signaling     | 4695S       | 1:1000   |
| IER3                    | Abcam              | ab65152     | 1:1000   |
| GAPDH                   | Santa Cruz Biotech | sc-25778    | 1:1000   |
| ZFP36                   | Proteintech        | 12737-1-AP  | 1:1000   |
| PARP                    | cell signaling     | 9532S       | 1:1000   |
| Caspase3                | Abcam              | ab32042     | 1:500    |
| CLL20                   | Novus Biologicals  | MAB360      | 1:1000   |
| CXCL1                   | Novus Biologicals  | AF275       | 1:1000   |
| p65                     | cell signaling     | 8242S       | 1:1000   |

|                                               |                          |                   |        |
|-----------------------------------------------|--------------------------|-------------------|--------|
| p(Ser276)<br>p65                              | Millipore                | AB3375            | 1:1000 |
| hnRNPK                                        | cell signaling           | 9081S             | 1:1000 |
| RIG1                                          | ThermoFischer Scientific | PA5-23497         | 1:500  |
| MDA5                                          | ThermoFischer Scientific | 700360            | 1:500  |
| H3                                            | Abcam                    | ab176842          | 1:1000 |
| <b>ChRIP antibodies</b>                       |                          |                   |        |
| <b>Antibodies</b>                             | <b>Company</b>           | <b>Identifier</b> |        |
| IgG                                           | Millipore                | 12-370            | 1:500  |
| hnRNPK                                        | ThermoFisher             | PA5-27522         | 1:500  |
| Anti-dsRNA J2                                 | Jena Bioscience          | RNT-SCI-10010200  | 1:500  |
| <b>Dot blot and Immunostaining antibodies</b> |                          |                   |        |
| <b>Antibodies</b>                             | <b>Company</b>           | <b>Identifier</b> |        |
| DAPI                                          | cell signaling           | 2282S             | 1:500  |
| RPS3                                          | Novus                    | NBP1-33691        | 1:250  |
| Anti-dsRNA J2                                 | Jena Bioscience          | RNT-SCI-10010200  | 1:250  |
| <b>IHC antibodies</b>                         |                          |                   |        |
| Ki67                                          | Abcam                    | Ab16667           | 1:500  |

**Supplementary Table 6 – Validation for all the antibodies used in this study**

| <b>Western blot antibodies</b> |                    |                   |                                                                                                                                                                                         |                                               |
|--------------------------------|--------------------|-------------------|-----------------------------------------------------------------------------------------------------------------------------------------------------------------------------------------|-----------------------------------------------|
| <b>Antibodies</b>              | <b>Company</b>     | <b>Identifier</b> | <b>Validation</b>                                                                                                                                                                       |                                               |
|                                |                    |                   | <b>Company</b>                                                                                                                                                                          | <b>References</b>                             |
| pAKT (Ser473)                  | cell signaling     | 4060S             | <a href="https://www.cellsignal.com/product/productDetail.jsp?productId=4060">https://www.cellsignal.com/product/productDetail.jsp?productId=4060</a>                                   | Nikos Koundouros, et. al., Cell., 2020        |
| AKT                            | cell signaling     | 4691S             | <a href="https://www.cellsignal.com/products/primary-antibodies/akt-pan-c67e7-rabbit-mab/4691">https://www.cellsignal.com/products/primary-antibodies/akt-pan-c67e7-rabbit-mab/4691</a> | Johanna Wagner, et. al., Cell., 2019          |
| pERK                           | cell signaling     | 9101S             | <a href="https://www.cellsignal.com/product/productDetail.jsp?productId=9101">https://www.cellsignal.com/product/productDetail.jsp?productId=9101</a>                                   | Suji Han, et. al., Cancers., 2019             |
| ERK                            | cell signaling     | 4695S             | <a href="https://www.cellsignal.com/product/productDetail.jsp?productId=4695">https://www.cellsignal.com/product/productDetail.jsp?productId=4695</a>                                   | Zaigham M Khan, et. al., Nature., 2020        |
| IER3                           | Abcam              | ab65152           | <a href="https://www.abcam.com/iex/ier3-antibody-ab65152.html">https://www.abcam.com/iex/ier3-antibody-ab65152.html</a>                                                                 | Zhou Q et al., Int J Mol Sci., 2017           |
| GAPDH                          | Santa Cruz Biotech | sc-25778          | <a href="https://www.scbt.com/sv/p/gapdh-antibody-fl-335">https://www.scbt.com/sv/p/gapdh-antibody-fl-335</a>                                                                           | Llorian, M. et al., Nucleic Acids Res., 2016. |
| ZFP36                          | Proteintech        | 12737-1-AP        | <a href="https://www.ptglab.com/products/ZFP36-Antibody-12737-1-AP.htm">https://www.ptglab.com/products/ZFP36-Antibody-12737-1-AP.htm</a>                                               | Yuan Wang et al., Sci Rep., 2017              |

| PARP                                          | cell signaling           | 9532S            | <a href="https://www.cellsignal.com/product/productDetail.jsp?productId=9532">https://www.cellsignal.com/product/productDetail.jsp?productId=9532</a>                                                                                                                                       | Maximilien Tailler, et. al., Cell Death Differ., 2019                                                                                                                                                                    |
|-----------------------------------------------|--------------------------|------------------|---------------------------------------------------------------------------------------------------------------------------------------------------------------------------------------------------------------------------------------------------------------------------------------------|--------------------------------------------------------------------------------------------------------------------------------------------------------------------------------------------------------------------------|
| Caspase3                                      | Abcam                    | ab32042          | <a href="https://www.abcam.com/cleaved-caspase-3-antibody-e83-77-ab32042.html">https://www.abcam.com/cleaved-caspase-3-antibody-e83-77-ab32042.html</a>                                                                                                                                     | Kumar A et al., Cell Rep., 2020                                                                                                                                                                                          |
| CLL20                                         | Novus Biologicals        | MAB360           | <a href="https://www.novusbio.com/products/ccl20-mip-3-alpha-antibody-67310_mab360">https://www.novusbio.com/products/ccl20-mip-3-alpha-antibody-67310_mab360</a>                                                                                                                           | B Soto et al., Sci Rep., 2017                                                                                                                                                                                            |
| CXCL1                                         | Novus Biologicals        | AF275            | <a href="https://www.novusbio.com/products/cxcl1-gro-alpha-kc-cinc-1-antibody_af275">https://www.novusbio.com/products/cxcl1-gro-alpha-kc-cinc-1-antibody_af275</a>                                                                                                                         | Keane MP et al., J. Immunol., 2002                                                                                                                                                                                       |
| p65                                           | cell signaling           | 8242S            | <a href="https://www.cellsignal.com/product/productDetail.jsp?productId=8242">https://www.cellsignal.com/product/productDetail.jsp?productId=8242</a>                                                                                                                                       | Hebah A Sindi, et. al., Nat Commun., 2020                                                                                                                                                                                |
| p(Ser276)<br>p65                              | Millipore                | AB3375           | <a href="https://www.merckmillipore.com/SE/en/product/Anti-NFB-p65-Antibody-phospho-specific-Ser276,MM_NF-AB3375?">https://www.merckmillipore.com/SE/en/product/Anti-NFB-p65-Antibody-phospho-specific-Ser276,MM_NF-AB3375?</a>                                                             | Ashikawa, Kazuhiro, et al., J. Immunol., 2002                                                                                                                                                                            |
| hnRNPK                                        | cell signaling           | 9081S            | <a href="https://www.cellsignal.com/product/productDetail.jsp?productId=9081">https://www.cellsignal.com/product/productDetail.jsp?productId=9081</a>                                                                                                                                       | Helen Wong, et. al., Elife., 2020                                                                                                                                                                                        |
| RIG1                                          | Thermofischer Scientific | PA5-23497        | <a href="https://www.thermofisher.com/antibody/product/RIG-I-Antibody-Polyclonal/PA5-23497">https://www.thermofisher.com/antibody/product/RIG-I-Antibody-Polyclonal/PA5-23497</a>                                                                                                           | Cell Treatment Antibody Validation.<br><a href="https://www.thermofisher.com/antibody/product/RIG-I-Antibody-Polyclonal/PA5-23497">https://www.thermofisher.com/antibody/product/RIG-I-Antibody-Polyclonal/PA5-23497</a> |
| MDA5                                          | Thermofischer Scientific | 700360           | <a href="https://www.thermofisher.com/antibody/product/MDA5-Antibody-clone-33H12L34-Recombinant-Monoclonal/700360">https://www.thermofisher.com/antibody/product/MDA5-Antibody-clone-33H12L34-Recombinant-Monoclonal/700360</a>                                                             | Shao W et al., JCI insight., 2018                                                                                                                                                                                        |
| H3                                            | Abcam                    | ab176842         | <a href="https://www.abcam.com/histone-h3-antibody-epr16987-nuclear-marker-and-chip-grade-ab176842.html">https://www.abcam.com/histone-h3-antibody-epr16987-nuclear-marker-and-chip-grade-ab176842.html</a>                                                                                 | Bhattacharyya T et al., Curr Biol., 2019                                                                                                                                                                                 |
| <b>ChRIP antibodies</b>                       |                          |                  |                                                                                                                                                                                                                                                                                             |                                                                                                                                                                                                                          |
| Antibodies                                    | Company                  | Identifier       | Validation                                                                                                                                                                                                                                                                                  |                                                                                                                                                                                                                          |
|                                               |                          |                  | Company                                                                                                                                                                                                                                                                                     | References                                                                                                                                                                                                               |
| IgG                                           | Millipore                | 12-370           | <a href="https://www.merckmillipore.com/SE/en/product/Normal-Rabbit-IgG,MM_NF-12-370">https://www.merckmillipore.com/SE/en/product/Normal-Rabbit-IgG,MM_NF-12-370</a>                                                                                                                       | Frank, CL et al., Nat Neurosc., 2015                                                                                                                                                                                     |
| hnRNPK                                        | Thermofischer            | PA5-27522        | <a href="https://www.thermofisher.com/antibody/product/hnRNP-K-Antibody-Polyclonal/PA5-27522">https://www.thermofisher.com/antibody/product/hnRNP-K-Antibody-Polyclonal/PA5-27522</a>                                                                                                       | This Antibody was verified by Knockdown to ensure that the antibody binds to the antigen stated.                                                                                                                         |
| Anti-dsRNA J2                                 | Jena Bioscience          | RNT-SCI-10010200 | <a href="https://www.jenabioscience.com/rna-technologies/rna-analysis-detection/dsrna-detection/rnt-sci-10010-anti-dsrna-monoclonal-antibody-j2">https://www.jenabioscience.com/rna-technologies/rna-analysis-detection/dsrna-detection/rnt-sci-10010-anti-dsrna-monoclonal-antibody-j2</a> | Schönborn et al., Nucleic Acids Res., 1991                                                                                                                                                                               |
| <b>Dot blot and Immunostaining antibodies</b> |                          |                  |                                                                                                                                                                                                                                                                                             |                                                                                                                                                                                                                          |



| Antibodies    | Company         | Identifier       | Validation                                                                                                                                                                                                                                                                                  |                                                                                                  |
|---------------|-----------------|------------------|---------------------------------------------------------------------------------------------------------------------------------------------------------------------------------------------------------------------------------------------------------------------------------------------|--------------------------------------------------------------------------------------------------|
|               |                 |                  | Company                                                                                                                                                                                                                                                                                     | References                                                                                       |
| DAPI          | cell signaling  | 2282S            | <a href="https://www.cellsignal.com/product/productDetail.jsp?productId=2282">https://www.cellsignal.com/product/productDetail.jsp?productId=2282</a>                                                                                                                                       | Rafal Sadej, et. al., J Cell Sci., 2018                                                          |
| RPS3          | Novus           | NBP1-33691       | <a href="https://www.novusbio.com/products/rps3-antibody_nbp1-33691">https://www.novusbio.com/products/rps3-antibody_nbp1-33691</a>                                                                                                                                                         | This Antibody was verified by Knockdown to ensure that the antibody binds to the antigen stated. |
| Anti-dsRNA J2 | Jena Bioscience | RNT-SCI-10010200 | <a href="https://www.jenabioscience.com/rna-technologies/rna-analysis-detection/dsrna-detection/rnt-sci-10010-anti-dsrna-monoclonal-antibody-j2">https://www.jenabioscience.com/rna-technologies/rna-analysis-detection/dsrna-detection/rnt-sci-10010-anti-dsrna-monoclonal-antibody-j2</a> | Schönborn et al., Nucleic Acids Res., 1991                                                       |
| Ki67          | Abcam           | Ab16667          | <a href="https://www.abcam.com/ki67-antibody-sp6-ab16667.html">https://www.abcam.com/ki67-antibody-sp6-ab16667.html</a>                                                                                                                                                                     | Messal HA et al., Nat Protoc., 2021                                                              |
